# Supplementary material for: Changing patterns of global nitrogen deposition driven by socio-economic development
Source: PubMed Central journal article supplement — Nat Commun. 2025 Jan 2;16:46. doi: 10.1038/s41467-024-55606-y (PMC11695605; doi:10.1038/s41467-024-55606-y), 2025-01-02
Supplement: 41467_2024_55606_MOESM1_ESM.pdf [file 41467_2024_55606_MOESM1_ESM.pdf]

## Supplementary Information

# Changing patterns of global nitrogen deposition driven by socio-economic development

Jianxing Zhu<sup>1,#</sup>, Yanlong Jia<sup>2,#</sup>, Guirui Yu<sup>1,3,\*</sup>, Qiufeng Wang<sup>1,3</sup>, Nianpeng He<sup>4</sup>, Zhi Chen<sup>1,3</sup>, Honglin He<sup>1,3</sup>, Xianjin Zhu<sup>5</sup>, Pan Li<sup>6</sup>, Fusuo Zhang<sup>7</sup>, Xuejun Liu<sup>7</sup>, Keith Goulding<sup>8</sup>, David Fowler<sup>9</sup> and Peter Vitousek<sup>10</sup>

1 Key Laboratory of Ecosystem Network Observation and Modeling, Institute of Geographic Sciences and Natural Resources Research, Chinese Academy of Sciences, Beijing, China.

2 College of Forestry, Hebei Agricultural University, Baoding, China.

3 College of Resources and Environment, University of Chinese Academy of Sciences, Beijing, China.

4 Key Laboratory of Sustainable Forest Ecosystem Management-Ministry of Education, Northeast Forestry University, Harbin, China.

5 College of Agronomy, Shenyang Agricultural University, Shenyang, China.

6 Institute of Surface-Earth System Science, School of Earth System Science, Tianjin University, Tianjin, China.

7 State Key Laboratory of Nutrient Use and Management, College of Resources and Environmental Sciences, National Academy of Agriculture Green Development, China Agricultural University, Beijing, China.

8 Sustainable Agricultural Sciences Department, Rothamsted Research, Harpenden, UK.

9 Centre for Ecology and Hydrology, Penicuik, UK.

10 Department of Biology, Stanford University, Stanford, USA.

# These authors contributed equally: Jianxing Zhu and Yanlong Jia.

\* Correspondence author: Guirui Yu ([yugr@igsnr.ac.cn](mailto:yugr@igsnr.ac.cn))

- 28 **This file includes:**
- 29 Supplementary Figure 1-17
- 30 Supplementary Table 1-8
- 31 Supplementary References

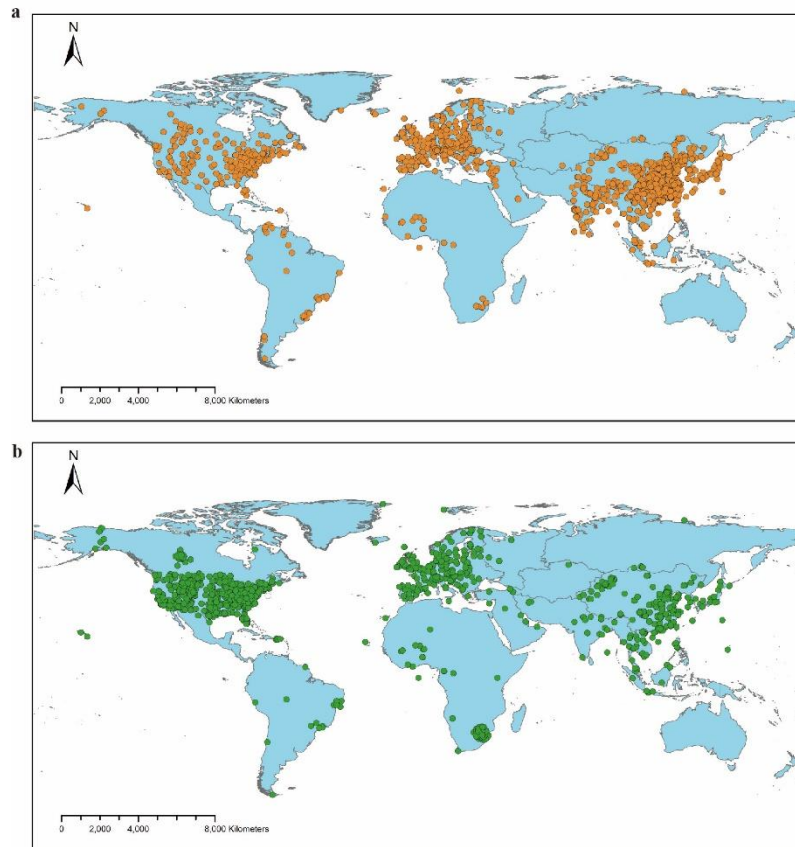

**Supplementary Figure 1 | Monitoring sites for nitrogen deposition.** (a) Spatial distribution of wet deposition observation sites (orange dots); (b) Spatial distribution of dry deposition observation sites (green dots). These sites are sourced from the Chinese Wet Deposition Observation Network (ChinaWD), the Co-operative Programme for Monitoring and Evaluation of the Long-Range Transmission of Air Pollutants in Europe (European Monitoring and Evaluation Programme, EMEP), the Clean Air Status and Trends Network (CASTNET), the Air Quality System (AQS), and the Ammonia Monitoring Network (AMoN) in the United States, the Canadian Air and Precipitation Monitoring Network (CAPMoN) and the National Air Pollution Surveillance Program (NAPS) in Canada, the Acid Deposition Monitoring Network in East Asia (EANET), the International Network to Study Deposition and Atmospheric Composition in Africa (INDAAF), the Nationwide Nitrogen Deposition Monitoring Network (NNDMN) from China Agricultural University, and 1,390 published papers.

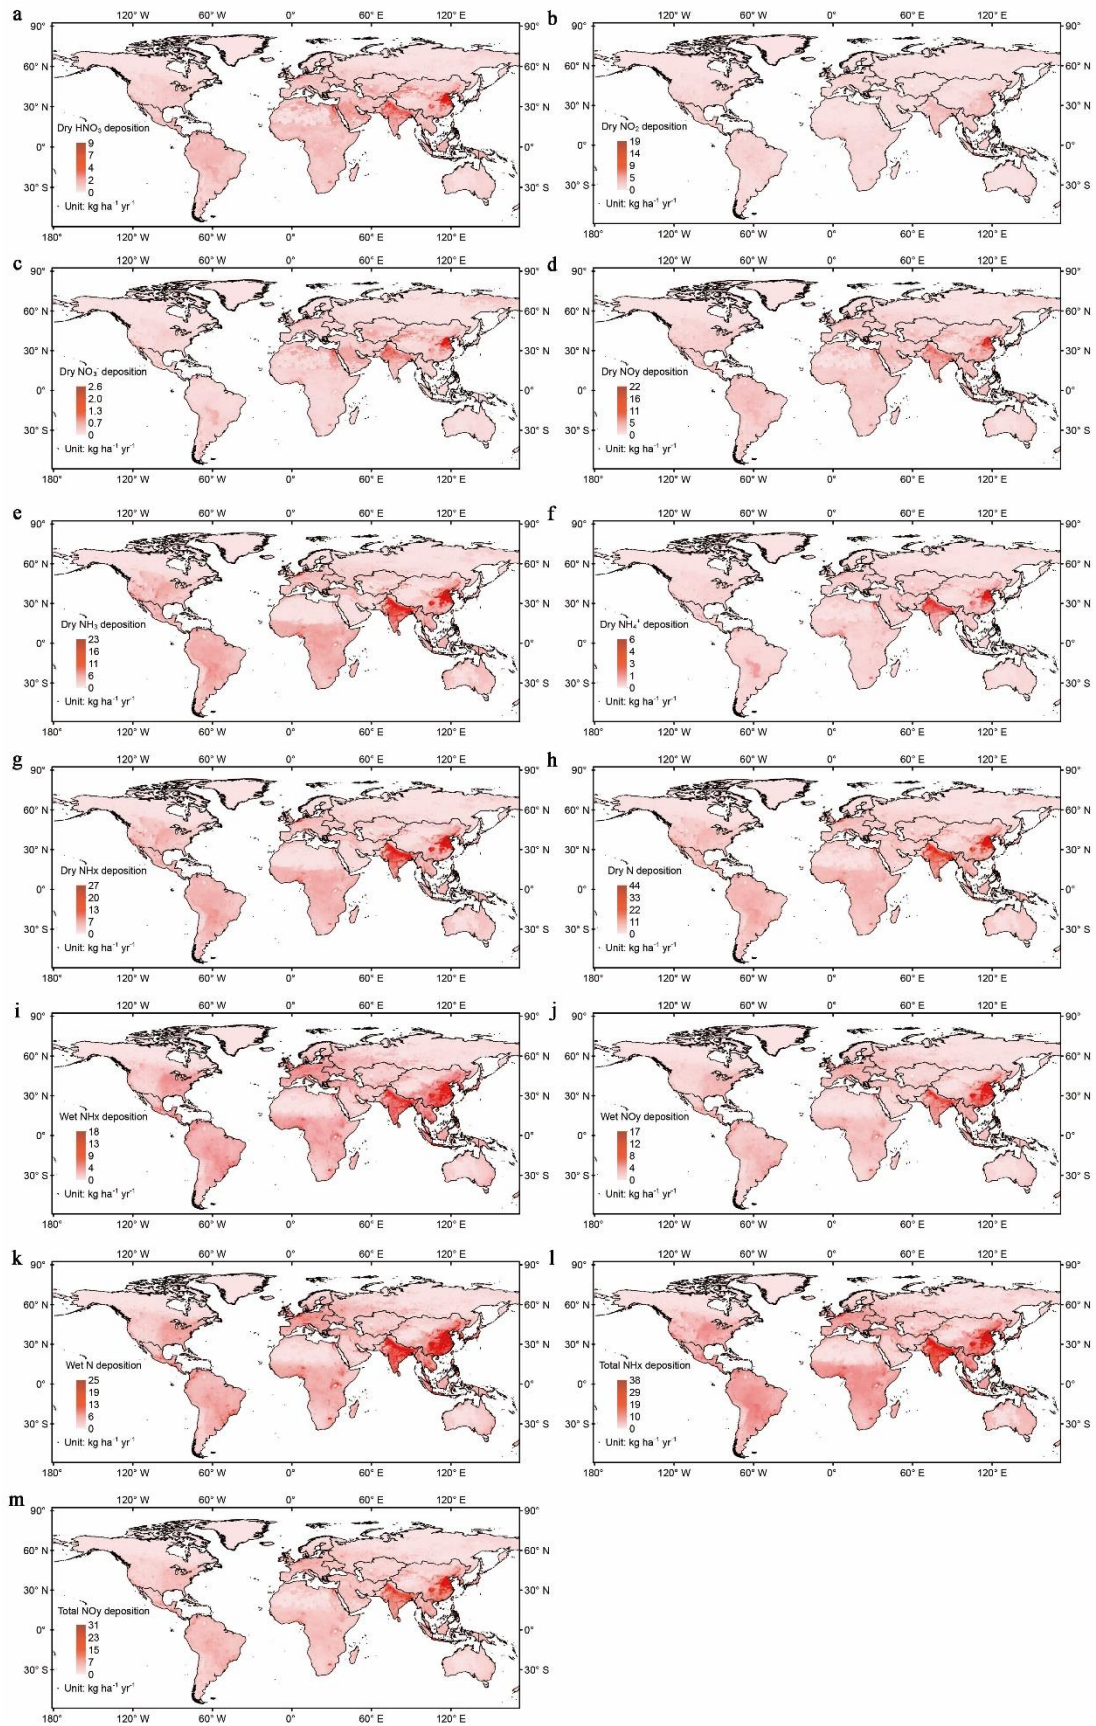

Supplementary Figure 2 | Spatial maps of global nitrogen deposition in 2020. (a) Spatial distribution of dry

HNO<sub>3</sub> deposition in 2020. (b) Spatial distribution of dry NO<sub>2</sub> deposition in 2020. (c) Spatial distribution of dry NO<sub>3</sub><sup>-</sup> deposition in 2020. (d) Spatial distribution of dry NO<sub>y</sub> deposition in 2020. (e) Spatial distribution of dry NH<sub>3</sub> deposition in 2020. (f) Spatial distribution of dry NH<sub>4</sub><sup>+</sup> deposition in 2020. (g) Spatial distribution of dry NH<sub>x</sub> deposition in 2020. (h) Spatial distribution of dry nitrogen (N) deposition in 2020. (i) Spatial distribution of wet NH<sub>x</sub> deposition in 2020. (j) Spatial distribution of wet NO<sub>y</sub> deposition in 2020. (k) Spatial distribution of wet N deposition in 2020. (l) Spatial distribution of total NH<sub>x</sub> deposition in 2020. (m) Spatial distribution of total NO<sub>y</sub> deposition in 2020. The results represent the average values from three random forest models. Data for Antarctica are not included.

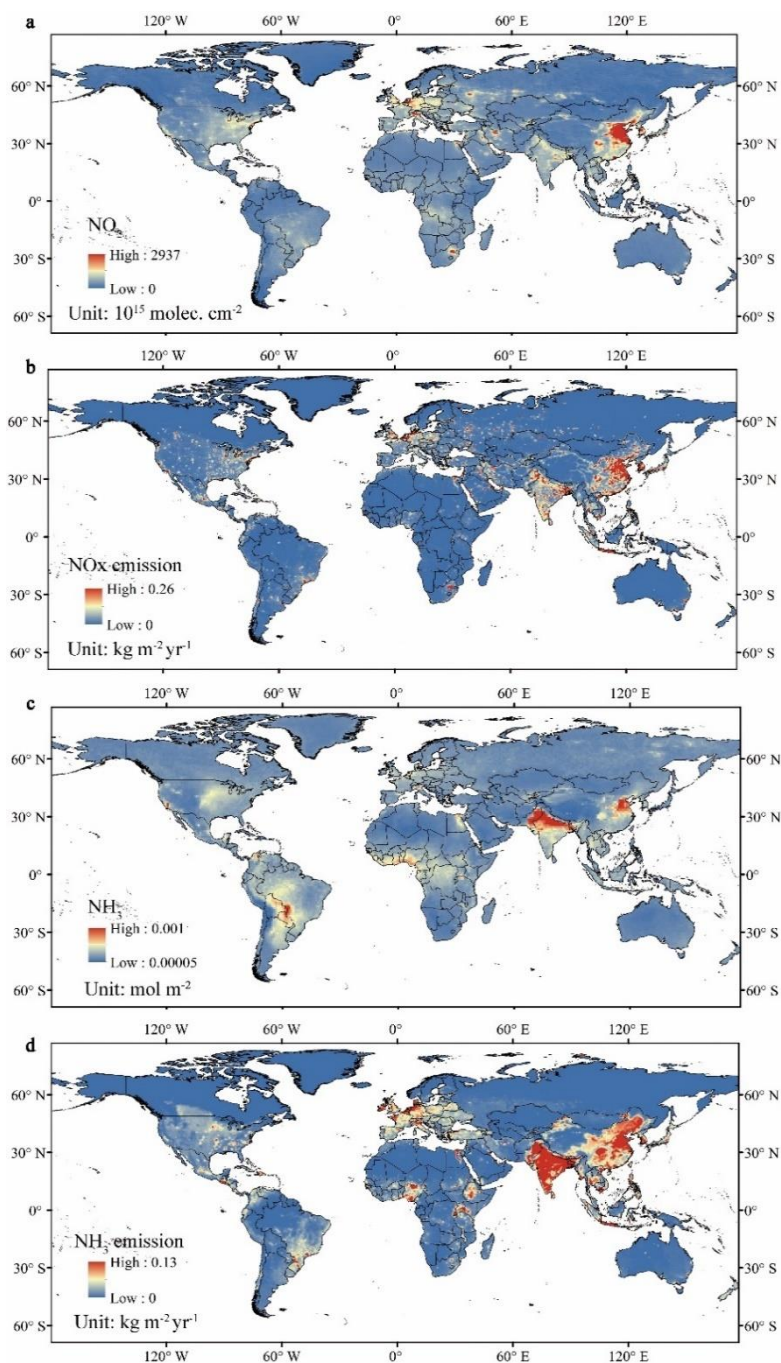

**Supplementary Figure 3 | The spatial patterns of satellite nitrogen column concentrations and reactive nitrogen emissions in 2020.** (a) NO<sub>2</sub> column concentration in 2020 from the Ozone Monitoring Instrument (OMI). (b) NO<sub>x</sub> emission in 2020 from the Community Emission Data System (CEDS) emission inventory. (c) NH<sub>3</sub> column concentration in 2020 from the Infrared Atmospheric Sounding Interferometer (IASI). (d) NH<sub>3</sub> emission in 2020 from the CEDS emission inventory. Data for the Antarctic are not included.



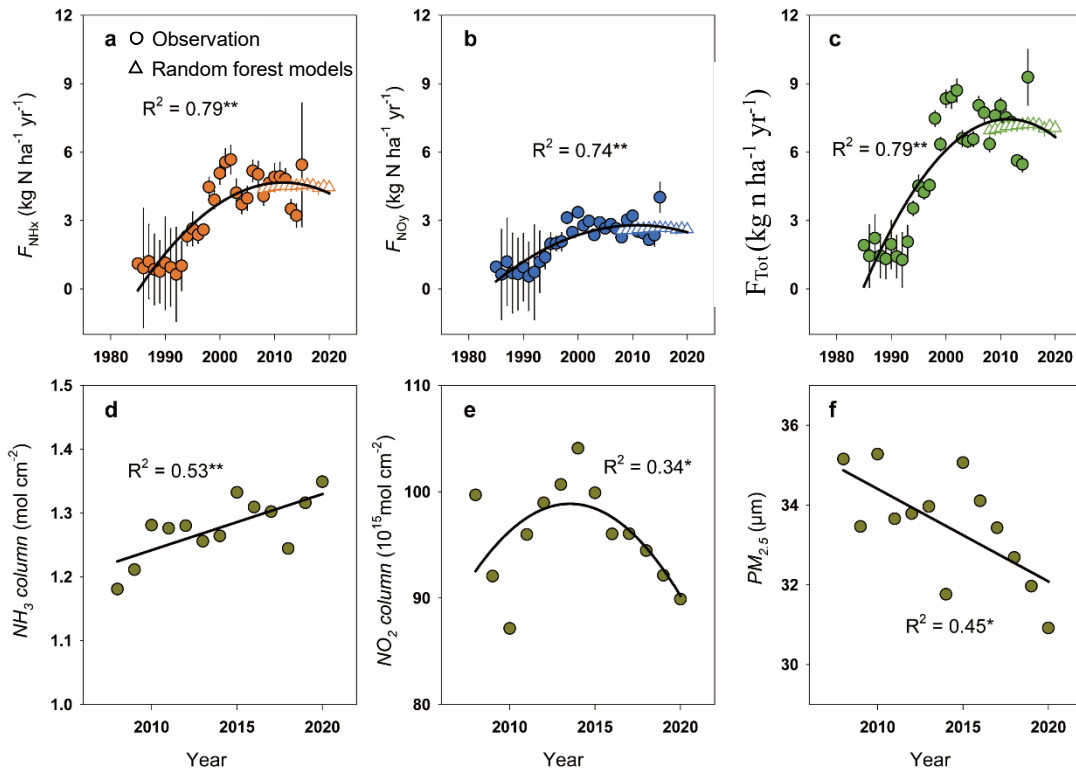

**Supplementary Figure 4 | Temporal dynamics of nitrogen deposition, satellite  $\text{NH}_3$  and  $\text{NO}_2$  column concentrations, and  $\text{PM}_{2.5}$  in Africa.** (a) Temporal dynamics of  $\text{NHx}$  deposition ( $F_{\text{NHx}}$ ) in Africa. (b) Temporal dynamics of  $\text{NOy}$  deposition ( $F_{\text{NOy}}$ ) in Africa. (c) Temporal dynamics of total nitrogen deposition ( $F_{\text{Tot}}$ ) in Africa. (d) Temporal dynamics of  $\text{NH}_3$  column concentration in Africa from the Infrared Atmospheric Sounding Interferometer (IASI). (e) Temporal dynamics of  $\text{NO}_2$  column concentration in Africa from the Ozone Monitoring Instrument (OMI). (f) Temporal dynamics of  $\text{PM}_{2.5}$  in Africa. For (a–c), circles represent direct observations with error bars showing SE (variation among monitoring sites), and triangles represent estimates from random forest models with error bars showing SE (variation among the three models' results).  $R^2$  is the coefficient of determination. **\*\*** and **\*** represent significance levels at  $P = 0.01$  and  $P = 0.05$ , respectively.

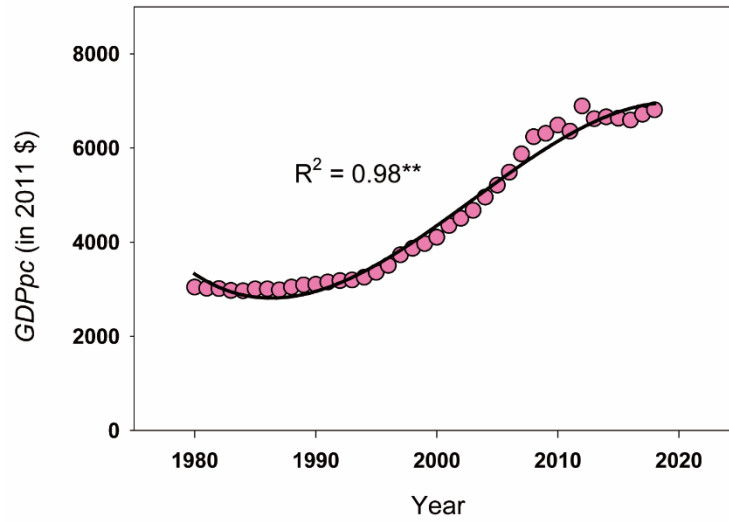

**Supplementary Figure 5 | Temporal dynamics of gross domestic product per capita in Africa.** Gross domestic product per capita (GDPpc) data is obtained from the Maddison Project Database 2020.  $R^2$  represents the coefficient of determination. \*\* and \* indicate significance levels at  $P = 0.01$  and  $P = 0.05$ , respectively.



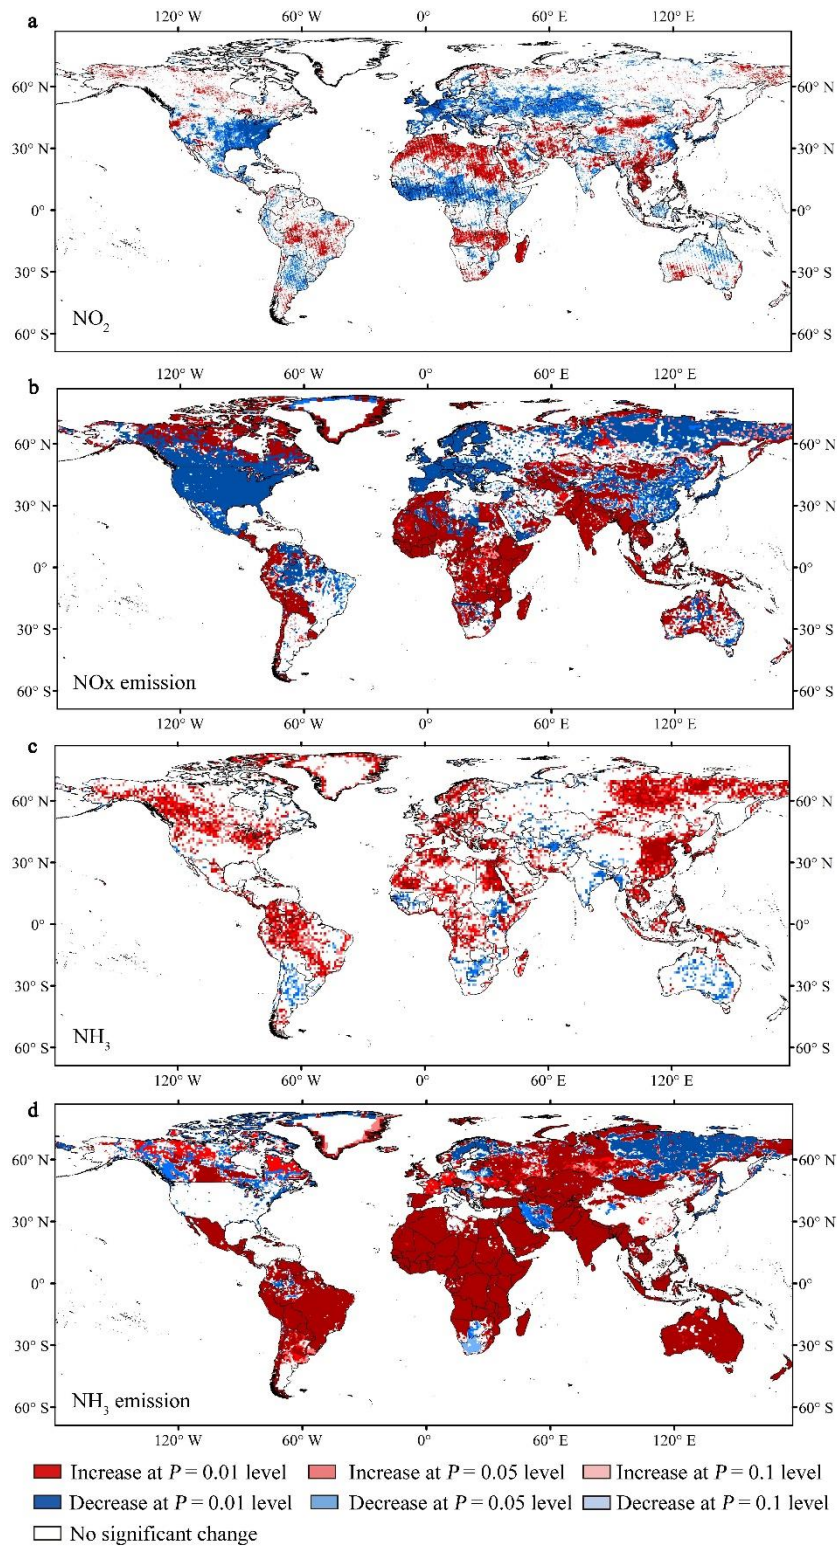

**Supplementary Figure 6 | Trends in satellite nitrogen column concentrations and reactive nitrogen emissions from 2008 to 2020.** (a) Trend analysis of satellite  $\text{NO}_2$  column concentration from the Ozone Monitoring Instrument (OMI) during 2008–2020. (b) Trend analysis of  $\text{NO}_x$  emission from the Community Emission Data System (CEDS) emission inventory during 2008–2020. (c) Trend analysis of satellite  $\text{NH}_3$  column concentration from the Infrared

Atmospheric Sounding Interferometer (IASI) during 2008–2020. (d) Trend analysis of NH<sub>3</sub> emission from the CEDS emission inventory during 2008–2020. The Mann–Kendall nonparametric test was used to assess the significance of these trends. Data for Antarctica are not included.

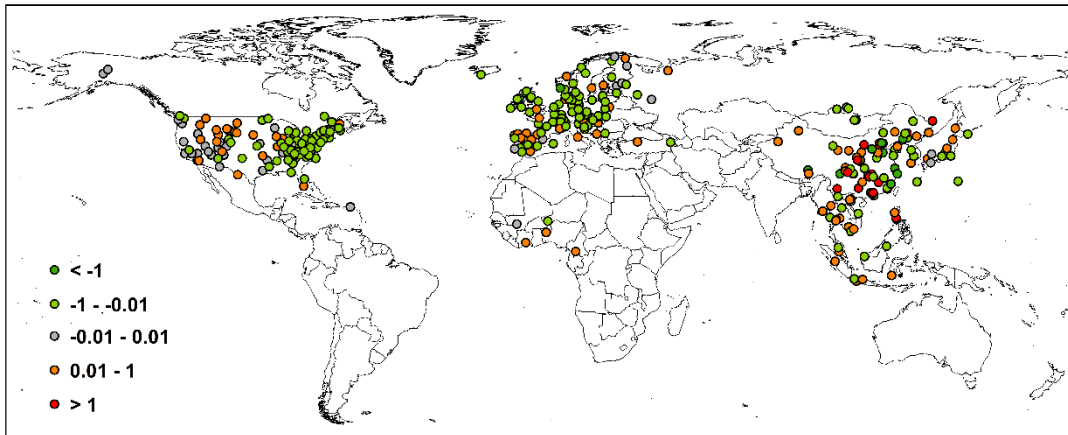

**Supplementary Figure 7 | Trends in wet nitrogen deposition at long-term monitoring sites ( $\text{kg N ha}^{-1} \text{ yr}^{-1}$ ).**

The dots represent the trends in wet deposition at sites with five years of continuous monitoring since 2000. Green dots indicate decreases and red dots indicate increases. Data for the Antarctic are not included.

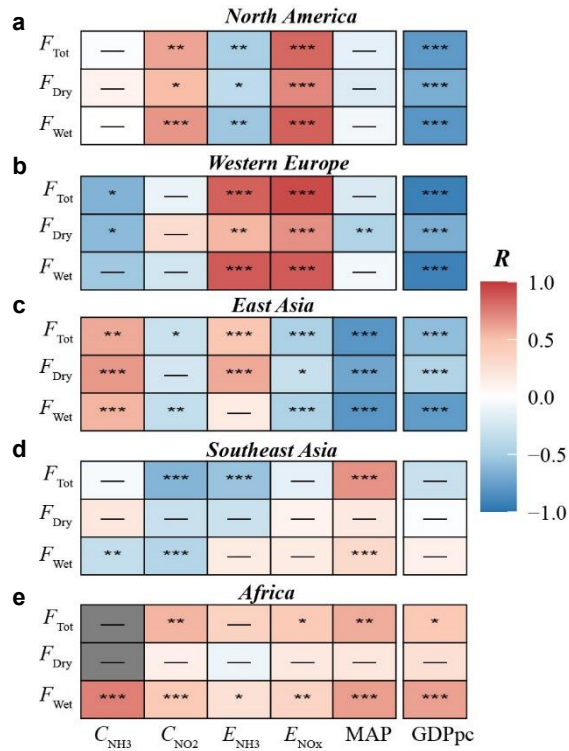

**Supplementary Figure 8 | Heat map of nitrogen deposition and its influencing factors.** (a) Correlations in North America. (b) Correlations in Western Europe. (c) Correlations in East Asia. (d) Correlations in Southeast Asia. (e) Correlations in Africa.  $F_{Tot}$ ,  $F_{Dry}$ ,  $F_{Wet}$  represent the total, dry and wet N deposition, respectively.  $C_{NH_3}$  and  $C_{NO_2}$  are the satellite  $NH_3$  and  $NO_2$  concentrations, respectively.  $E_{NH_3}$  and  $E_{NO_x}$  are the emissions of  $NH_3$  and  $NO_x$  respectively. MAP is the mean annual precipitation. GDPpc is the gross domestic product per capita.  $R$  represents the correlation coefficient. The symbols \*\*\*, \*\*, \*, and — represent significance at  $P < 0.0001$ ,  $P < 0.001$ ,  $P < 0.05$ , and no significant, respectively. Greyed out boxes indicate no data.

Chi-square=3.78( $P=0.15$ );  $df=2$ ; RMSEA=0.016

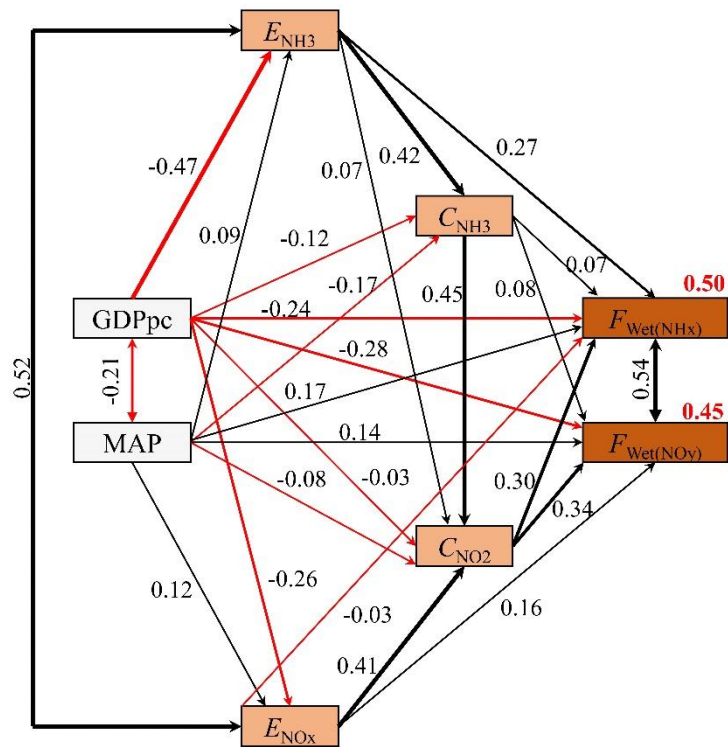

**Supplementary Figure 9 | Structural equation model of wet deposition.**  $F_{Wet(NHx)}$  is wet ammonium deposition,  $F_{Wet(NOy)}$  is wet nitrate deposition.  $C_{NH3}$  and  $C_{NO2}$  are the satellite  $NH_3$  and  $NO_2$  concentrations, respectively.  $E_{NH3}$  and  $E_{NOx}$  are the emissions of  $NH_3$  and  $NO_x$ , respectively. MAP is the mean annual precipitation. GDPpc is the gross domestic product per capita. Red and black arrows represent the negative and positive relationships and numbers on them the correlation or regression coefficients. The greater the coefficients, the thicker the line.

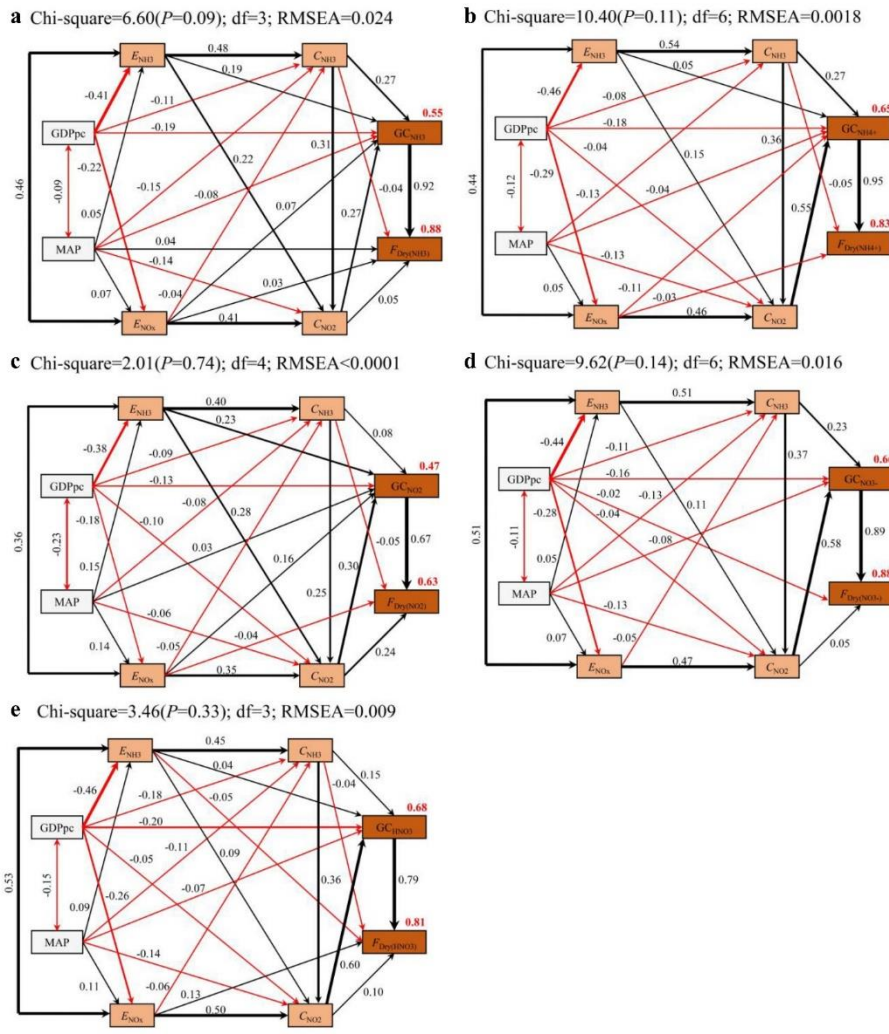

**Supplementary Figure 10 | Structural equation models of dry deposition.** (a) dry gaseous  $\text{NH}_3$  deposition ( $F_{\text{Dry}(\text{NH}_3)}$ ) and ground gaseous  $\text{NH}_3$  concentration ( $\text{GC}_{\text{NH}_3}$ ); (b) dry particulate  $\text{NH}_4^+$  deposition ( $F_{\text{Dry}(\text{NH}_4^+)}$ ) and ground particulate  $\text{NH}_4^+$  concentration ( $\text{GC}_{\text{NH}_4^+}$ ); (c) dry gaseous  $\text{NO}_2$  deposition ( $F_{\text{Dry}(\text{NO}_2)}$ ) and ground gaseous  $\text{NO}_2$  concentration ( $\text{GC}_{\text{NO}_2}$ ); (d) dry particulate  $\text{NO}_3^-$  deposition ( $F_{\text{Dry}(\text{NO}_3^-)}$ ) and ground particulate  $\text{NO}_3^-$  concentration ( $\text{GC}_{\text{NO}_3^-}$ ); (e) dry gaseous  $\text{HNO}_3$  deposition ( $F_{\text{Dry}(\text{HNO}_3)}$ ) and ground gaseous  $\text{HNO}_3$  concentration ( $\text{GC}_{\text{HNO}_3}$ ).  $\text{C}_{\text{NH}_3}$  and  $\text{C}_{\text{NO}_2}$  are the satellite  $\text{NH}_3$  and  $\text{NO}_2$  concentrations, respectively.  $E_{\text{NH}_3}$  and  $E_{\text{NO}_x}$  are the emissions of  $\text{NH}_3$  and  $\text{NO}_x$ , respectively. MAP is the mean annual precipitation. GDPpc is the gross domestic product per capita. Red and black arrows represent the negative and positive relationships and numbers on them the correlation or regression coefficients. The greater the coefficients, the thicker the line.

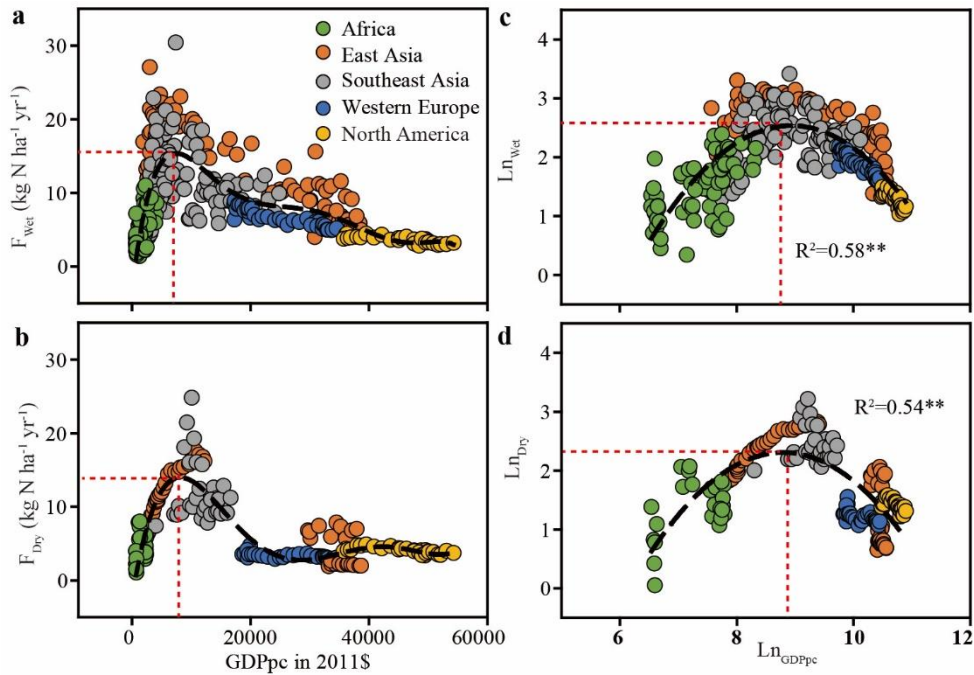

**Supplementary Figure 11 | The relationship between wet and dry nitrogen deposition and gross domestic product per capita.** (a) Relationship between wet nitrogen deposition and gross domestic product per capita (GDPpc). (b) Relationship between dry nitrogen deposition and GDPpc. (c) Relationship between the natural logarithm transformations of wet nitrogen deposition and GDPpc. (d) Relationship between the natural logarithm transformations of dry nitrogen deposition and GDPpc.  $F_{Wet}$  and  $F_{Dry}$  represent wet and dry deposition, respectively.  $Ln_{Wet}$  and  $Ln_{Dry}$  are the natural logarithm transformations of  $F_{Wet}$  and  $F_{Dry}$  respectively. The data used in a and b are observations of N deposition and GDPpc, and those in c and d the logarithmic values of nitrogen deposition and GDPpc. African countries are Niger, Mali, Cameroon and Cote d'Ivoire. Southeast Asian countries are Vietnam, Malaysia, Indonesia and Thailand. East Asian countries are China, South Korea and Japan. Western European countries are EU countries (the EU27). North American countries are the United States and Canada.  $R^2$  represents the coefficient of determination. \*\* and \* indicate significance levels at  $P = 0.01$  and  $P = 0.05$ , respectively.



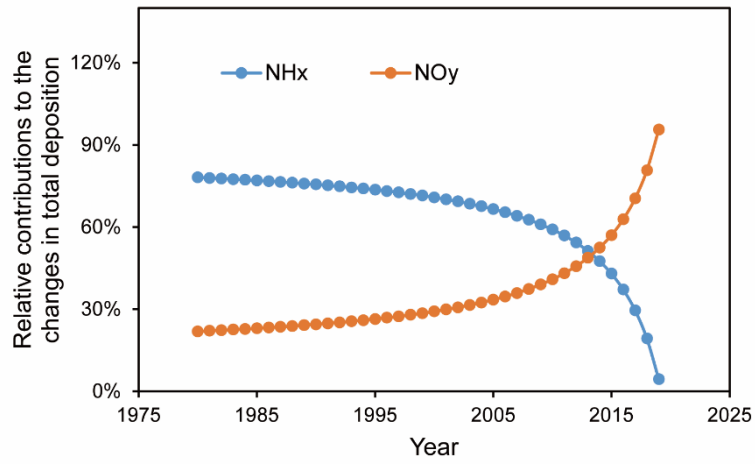

**Supplementary Figure 12 | Relative contribution of NHx and NOy deposition to changes in global total nitrogen deposition.** Results were calculated using the first derivatives from the fitted equation of global total nitrogen deposition changes between 1980 and 2020.

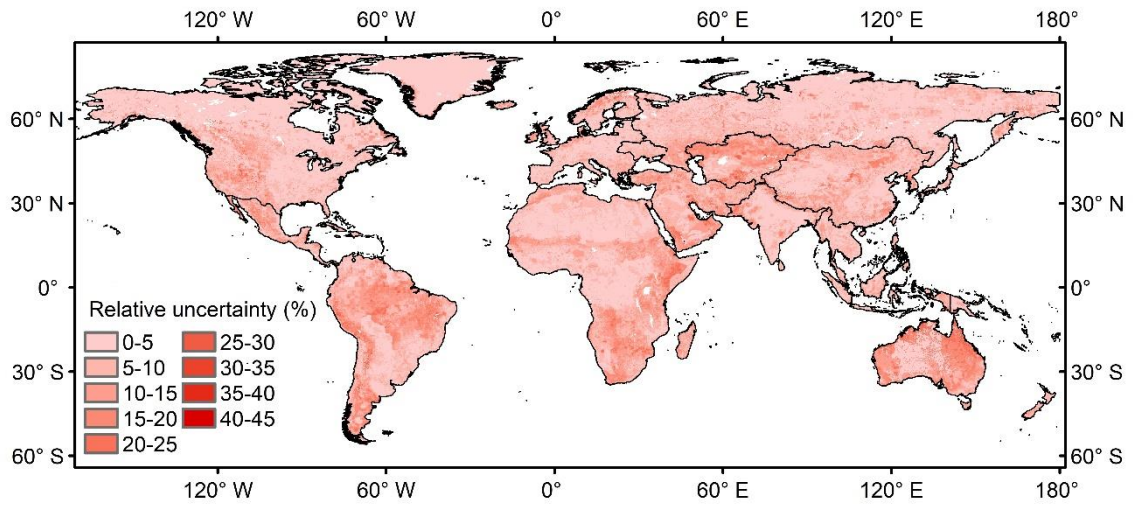

**Supplementary Figure 13 | The relative uncertainty of global nitrogen deposition.** The relative uncertainty at each pixel were calculated across three models. The relative uncertainty was defined as the ratio of standard error to the mean value of three models. The darker the red color, the greater the value.

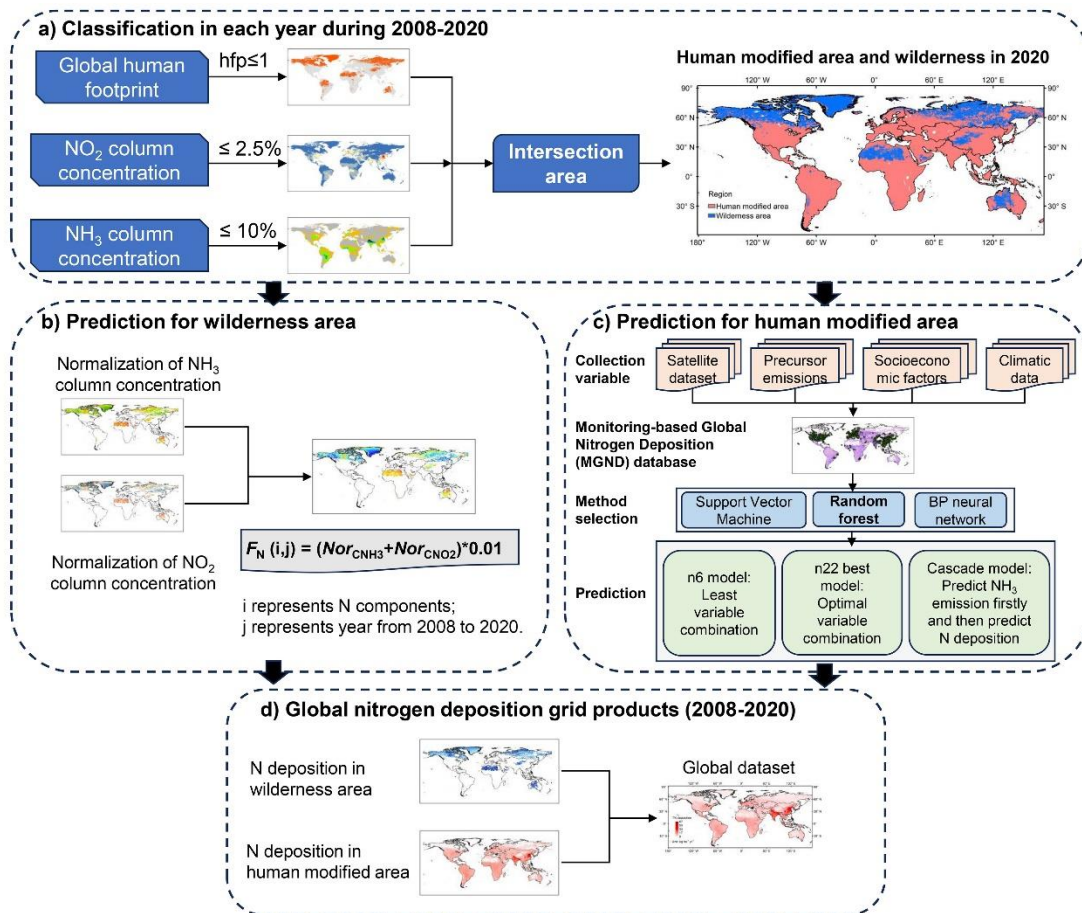

**Supplementary Figure 14 | Framework for generating the global nitrogen deposition grid dataset in this study.**

(a) Classification for each year from 2008 to 2020. Global land is classified into two categories based on global human footprint data, and satellite  $\text{NH}_3$  and  $\text{NO}_2$  concentrations. (b) Prediction for wilderness areas. These areas are less affected by anthropogenic activities, and nitrogen deposition is estimated using satellite  $\text{NH}_3$  and  $\text{NO}_2$  concentrations. (c) Prediction for human-modified areas. Machine learning methods are used to upscale nitrogen deposition from site scale to global grid scale in these areas. (d) Global nitrogen deposition grid products (2008–2020). The nitrogen deposition datasets for wilderness and human-modified areas are combined to create a global dataset of nitrogen deposition flux for 2008–2020, with a spatial resolution of  $0.125^\circ \times 0.125^\circ$ .

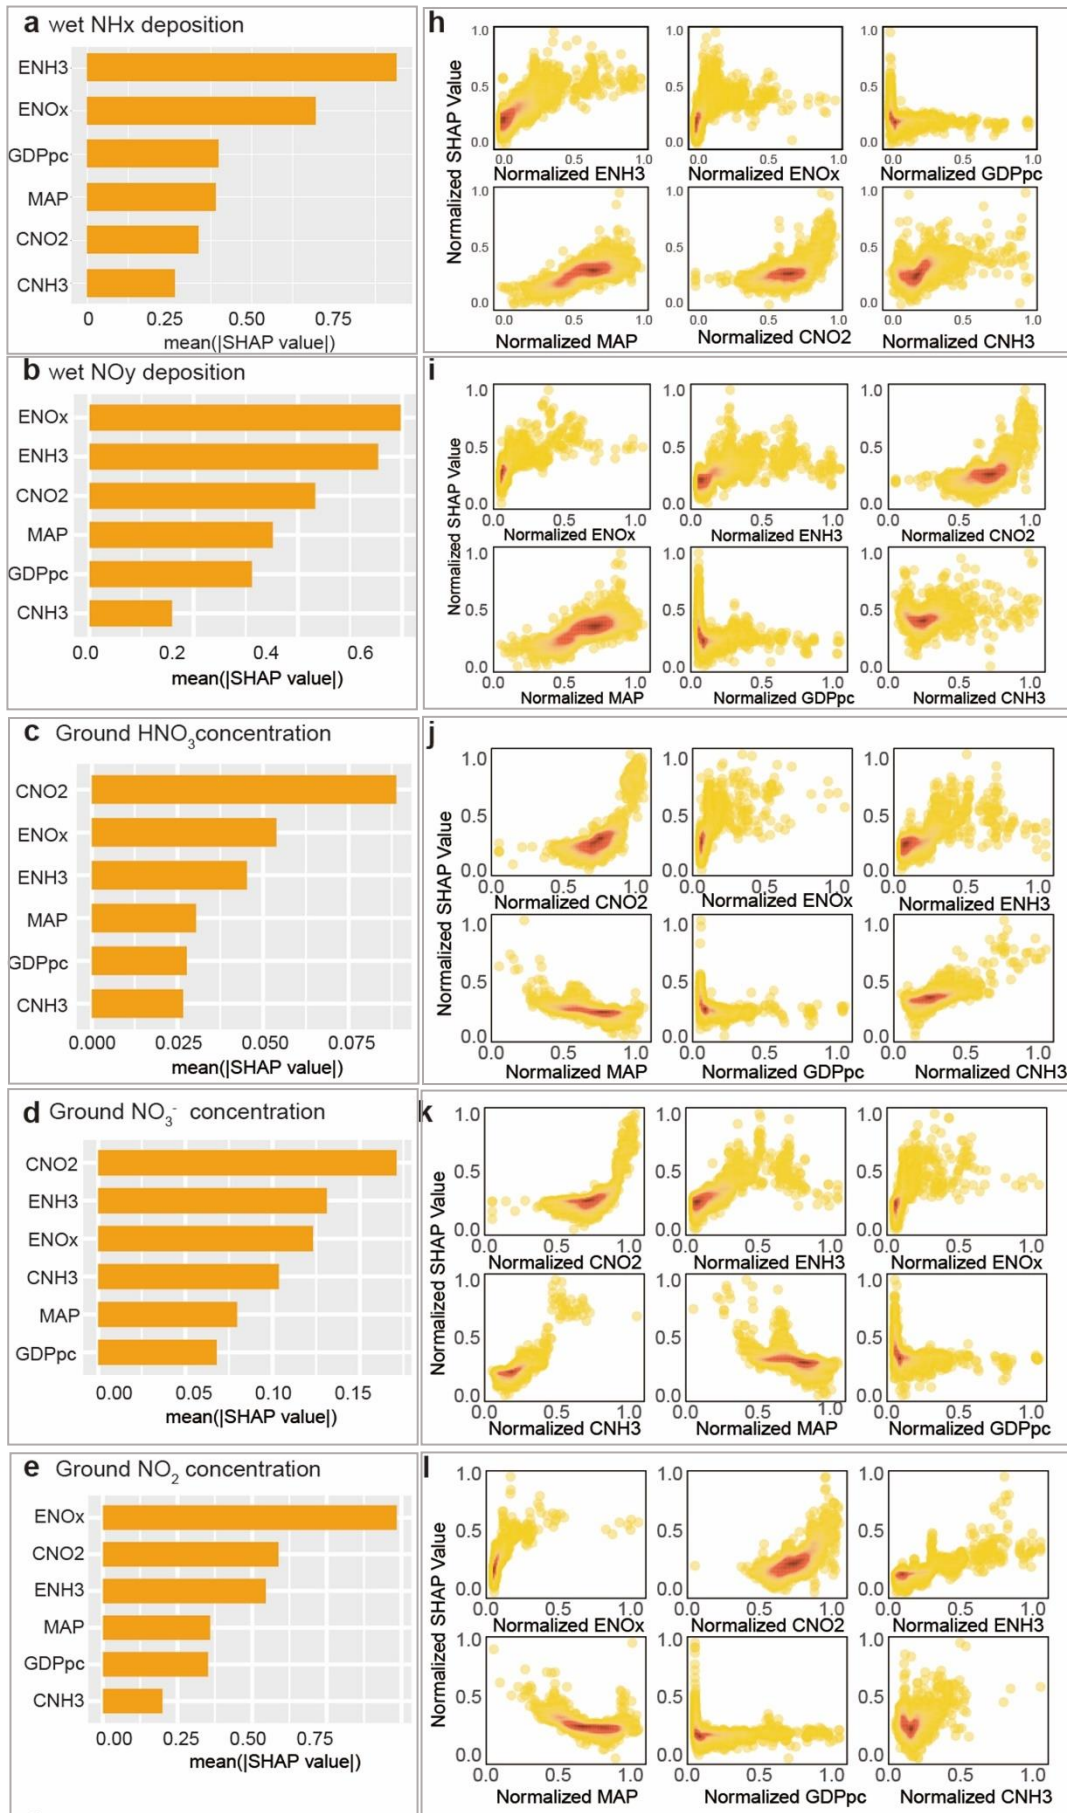

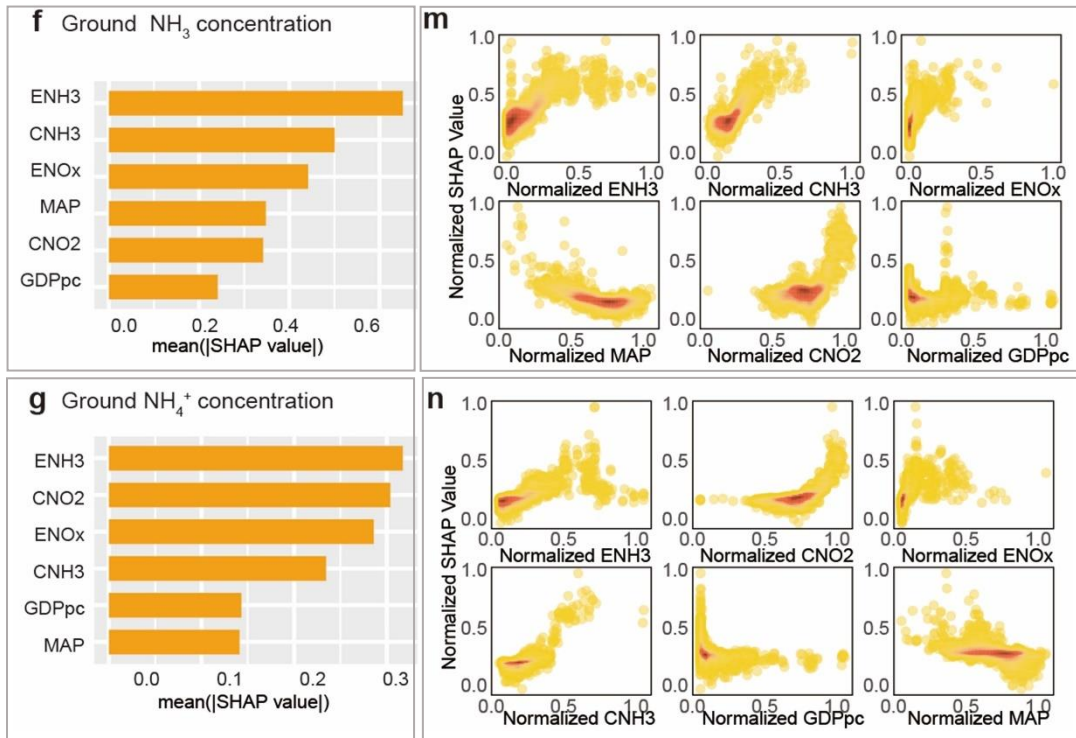

**Supplementary Figure 15 | Predictors of the n6 model.** (a-g) Importance of each predictor in predicting global nitrogen deposition. (h-n) Responses of Sharply values to the six predictors. The colors in the main plot indicate sample density (high density shown in dark orange).  $C_{\text{NH}_3}$  and  $C_{\text{NO}_2}$  represent satellite  $\text{NH}_3$  and  $\text{NO}_2$  concentrations, respectively.  $E_{\text{NH}_3}$  and  $E_{\text{NO}_x}$  denote emissions of  $\text{NH}_3$  and  $\text{NO}_x$ , respectively. MAP stands for mean annual precipitation, and GDPpc refers to gross domestic product per capita.



wet NH<sub>x</sub> deposition

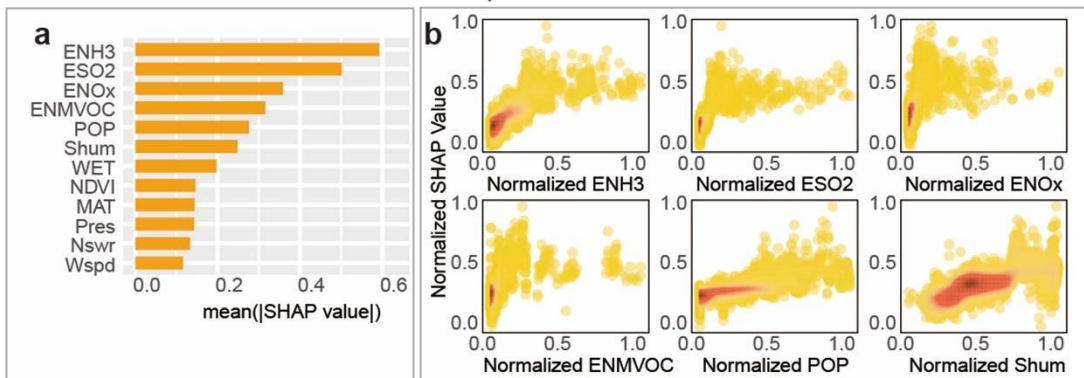

wet NO<sub>y</sub> deposition

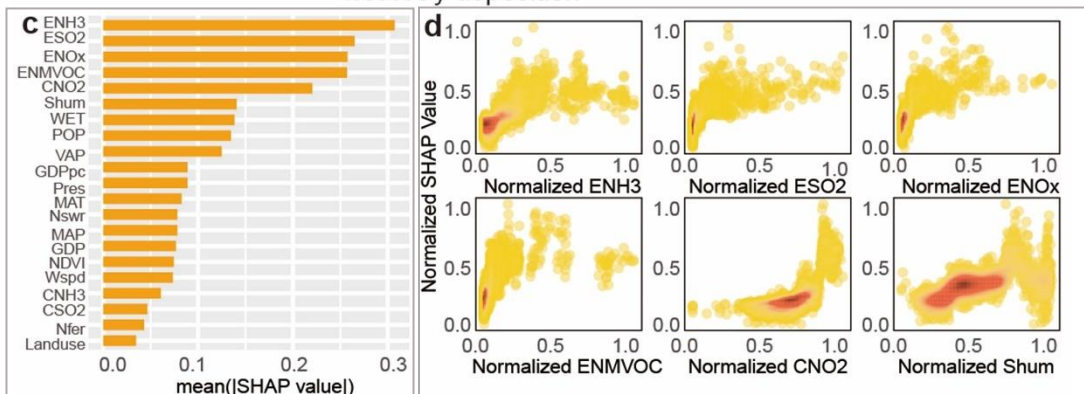

Ground HNO<sub>3</sub> concentration

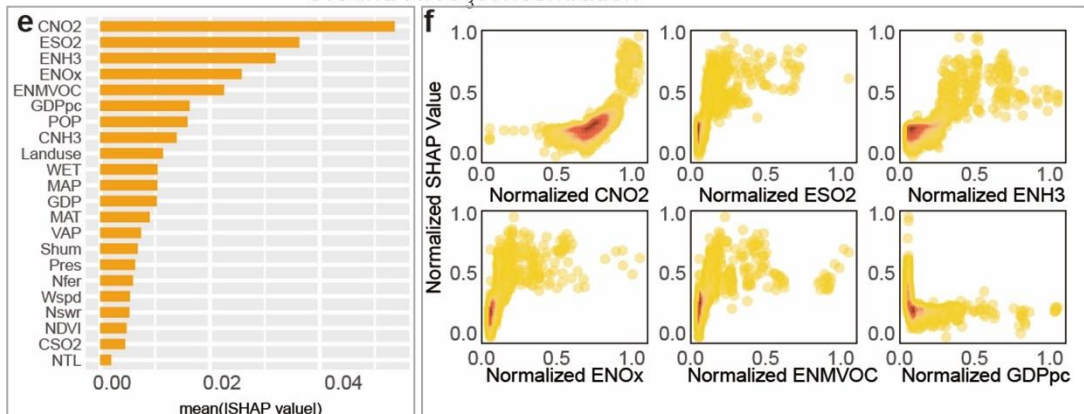

Ground NO<sub>3</sub><sup>-</sup> concentration

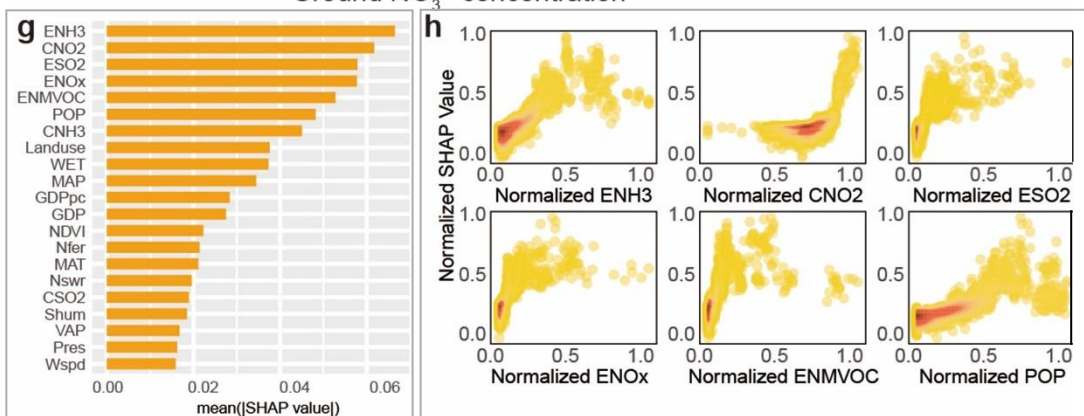

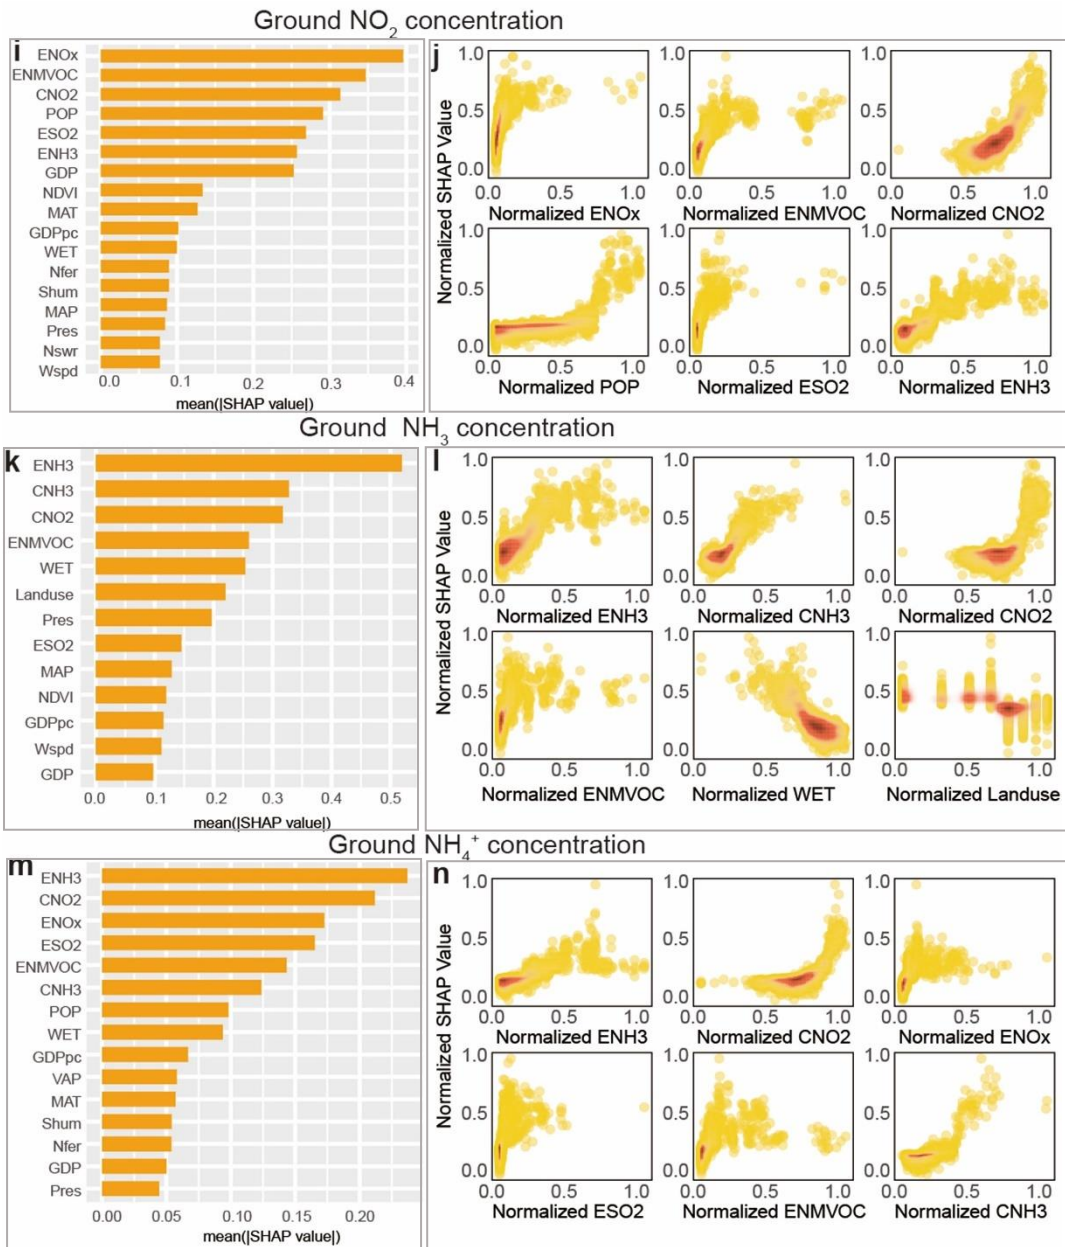

**Supplementary Figure 16 | Predictors of n22-best model.** (a, c, e, g, i, k, m) Importance of each predictor in predicting global nitrogen deposition. (b, d, f, h, j, l, n) Responses of Sharply values to the top six most important predictors. The colors in the main plot indicate sample density (high density shown in dark orange). CNH<sub>3</sub>, CNO<sub>2</sub>, and CSO<sub>2</sub> represent satellite NH<sub>3</sub>, NO<sub>2</sub>, and SO<sub>2</sub> concentrations, respectively. ENH<sub>3</sub>, ENO<sub>x</sub>, ESO<sub>2</sub>, and ENMVOc denote emissions of NH<sub>3</sub>, NO<sub>x</sub>, SO<sub>2</sub>, and non-methane volatile organic compounds (NMVOc), respectively. MAP is mean annual precipitation, MAT is mean annual temperature, WET indicates the number of wet days, VAP is vapor pressure, Nswrs is net shortwave radiation flux, Pres is surface pressure, Shum is specific humidity, Wspd is wind speed, NDVI is the Normalized Difference Vegetation Index, Landuse refers to land use data from Global Production–Living–Ecological Space data, Nfer represents nitrogen fertilizer use, GDP is gross domestic product, GDPpc is gross domestic product per capita, POP is population, and NTL is night light.



### NH<sub>3</sub> emission

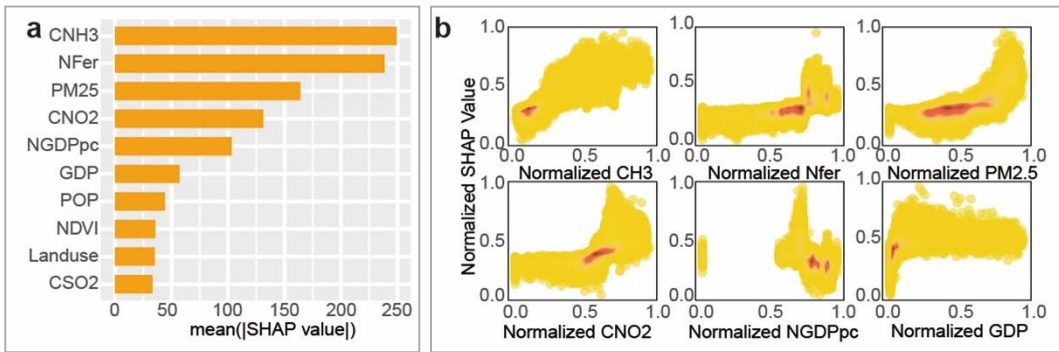

### wet NH<sub>x</sub> deposition

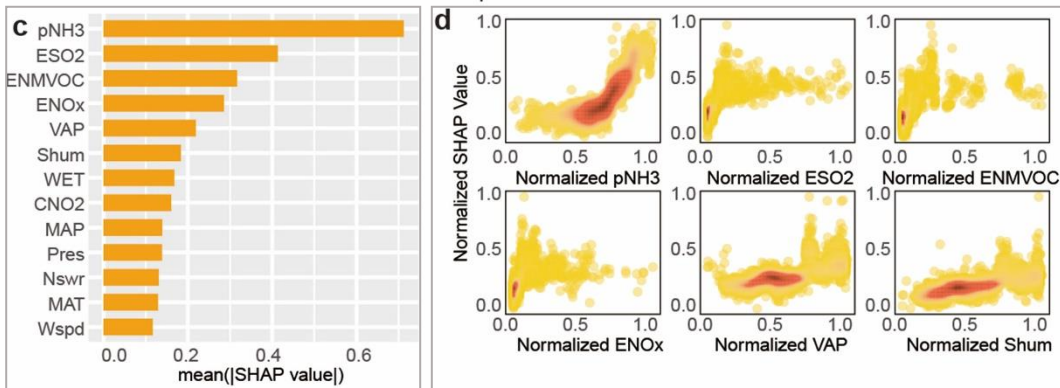

### wet NO<sub>y</sub> deposition

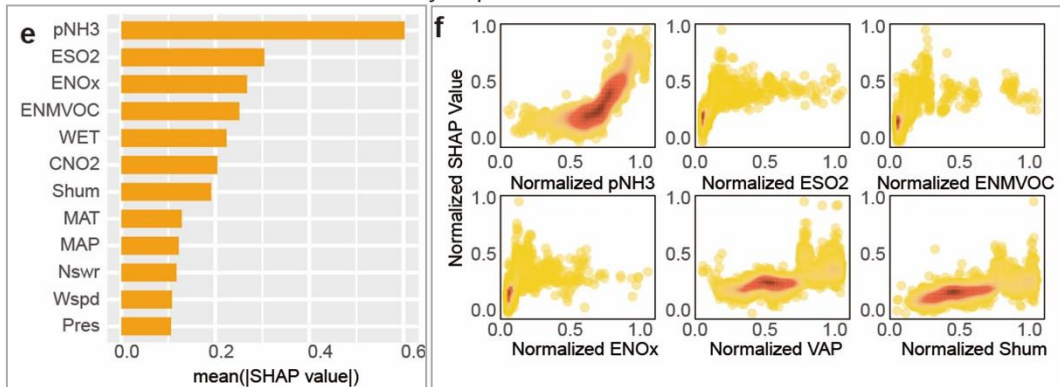

### Ground HNO<sub>3</sub> concentration

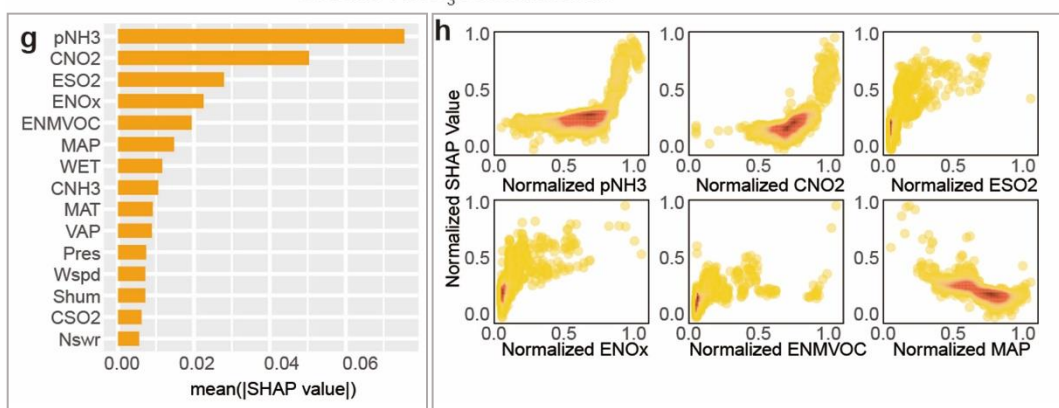

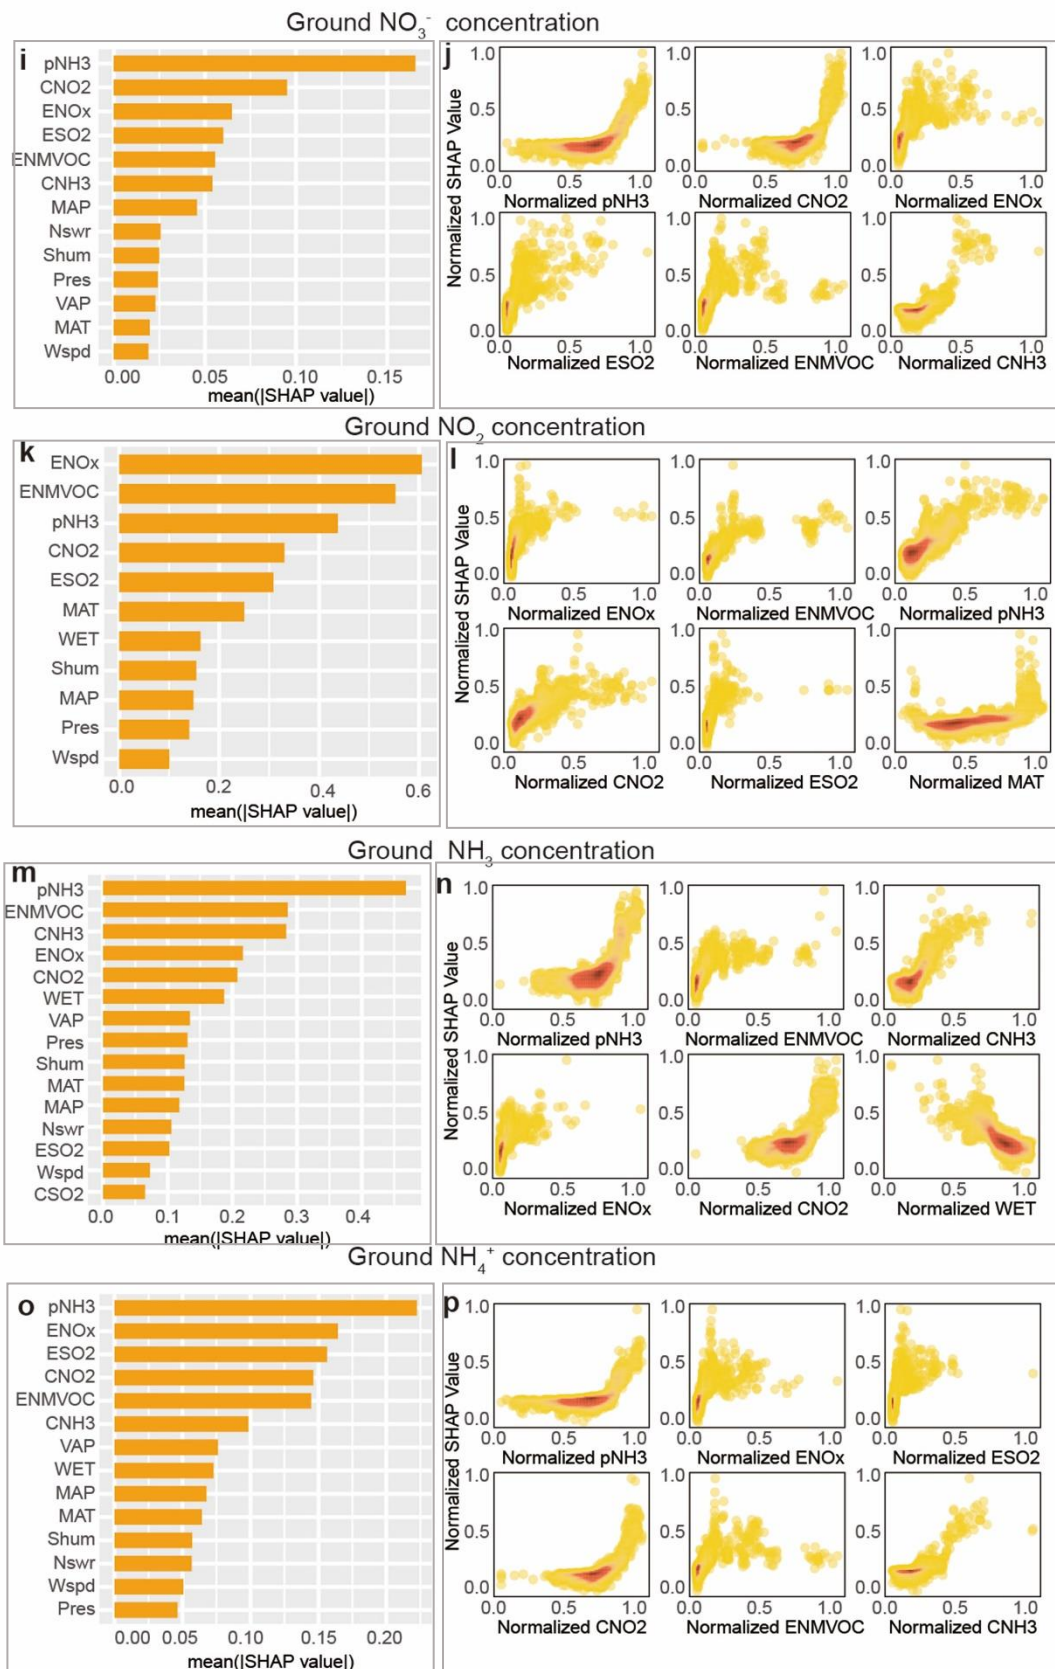

**Supplementary Figure 17 | Predictors of cascade model.** (a, c, e, g, i, k, m, o) Importance of each predictor in predicting  $\text{NH}_3$  emissions and global nitrogen deposition. (b, d, f, h, j, l, n, p) Responses of Sharply values to the

top six most important predictors. The colors in the main plot indicate sample density (high density shown in dark orange).  $p\text{NH}_3$  represents the predicted  $\text{NH}_3$  emissions.  $\text{CNH}_3$ ,  $\text{CNO}_2$ , and  $\text{CSO}_2$  indicate satellite  $\text{NH}_3$ ,  $\text{NO}_2$ , and  $\text{SO}_2$  concentrations, respectively.  $\text{ENH}_3$ ,  $\text{ENO}_x$ ,  $\text{ESO}_2$ , and  $\text{ENMVOC}$  denote emissions of  $\text{NH}_3$ ,  $\text{NO}_x$ ,  $\text{SO}_2$ , and non-methane volatile organic compounds (NMVOC), respectively. MAP stands for mean annual precipitation, MAT for mean annual temperature, WET indicates the number of wet days, VAP is vapor pressure, Nswrs is net shortwave radiation flux, Pres is surface pressure, Shum is specific humidity, Wspd is wind speed, NDVI is the Normalized Difference Vegetation Index, Landuse refers to land use data from the Global Production - Living - Ecological Space data, Nfer represents nitrogen fertilizer use, GDP is gross domestic product, GDPpc is gross domestic product per capita, POP is the population, and NTL is night light.

**Supplementary Table 1 | Monitoring-based Global Nitrogen Deposition database.**  $F_{\text{Wet}(\text{NH}_x)}$  represents wet ammonium deposition.  $F_{\text{Wet}(\text{NO}_y)}$  represents wet nitrate deposition.  $F_{\text{Dry}(\text{NH}_3)}$  represents dry gaseous  $\text{NH}_3$  deposition.  $F_{\text{Dry}(\text{NH}_4^+)}$  represents dry particulate  $\text{NH}_4^+$  deposition.  $F_{\text{Dry}(\text{NO}_2)}$  represents dry gaseous  $\text{NO}_2$  deposition.  $F_{\text{Dry}(\text{NO}_3^-)}$  represents dry particulate  $\text{NO}_3^-$  deposition.  $F_{\text{Dry}(\text{HNO}_3)}$  represents dry gaseous  $\text{HNO}_3$  deposition.  $F_{\text{Dry}(\text{NH}_x)}$  represents dry  $\text{NH}_x$  deposition.  $F_{\text{Dry}(\text{NO}_y)}$  represents dry  $\text{NO}_y$  deposition.  $F_{\text{Dry}}$  represents dry nitrogen deposition.  $F_{\text{Wet}}$  represents wet nitrogen deposition.  $F_{\text{NH}_x}$  represents total  $\text{NH}_x$  deposition.  $F_{\text{NO}_y}$  represents total  $\text{NO}_y$  deposition.  $F_{\text{Tot}}$  represents total nitrogen deposition.

| Variable type           | Components                      | Monitoring site-year |           | Grid product |                                  |
|-------------------------|---------------------------------|----------------------|-----------|--------------|----------------------------------|
|                         |                                 | Year                 | Site-year | Year         | Spatial resolution               |
| Observational variables | $F_{\text{Wet}(\text{NH}_x)}$   | 1977–2020            | 12,906    | 2008–2020    | $0.125^\circ \times 0.125^\circ$ |
|                         | $F_{\text{Wet}(\text{NO}_y)}$   | 1977–2020            | 12,902    | 2008–2020    | $0.125^\circ \times 0.125^\circ$ |
|                         | $F_{\text{Dry}(\text{NH}_3)}$   | 1986–2021            | 3,608     | 2008–2020    | $0.125^\circ \times 0.125^\circ$ |
|                         | $F_{\text{Dry}(\text{NH}_4^+)}$ | 1986–2021            | 5,156     | 2008–2020    | $0.125^\circ \times 0.125^\circ$ |
|                         | $F_{\text{Dry}(\text{NO}_2)}$   | 1980–2020            | 7,980     | 2008–2020    | $0.125^\circ \times 0.125^\circ$ |
|                         | $F_{\text{Dry}(\text{HNO}_3)}$  | 1986–2021            | 4,872     | 2008–2020    | $0.125^\circ \times 0.125^\circ$ |
|                         | $F_{\text{Dry}(\text{NO}_3^-)}$ | 1986–2021            | 5,247     | 2008–2020    | $0.125^\circ \times 0.125^\circ$ |
|                         | Sum                             |                      | 52,671    |              |                                  |
| Statistical variables   | $F_{\text{Dry}(\text{NH}_x)}$   |                      |           | 2008–2020    | $0.125^\circ \times 0.125^\circ$ |
|                         | $F_{\text{Dry}(\text{NO}_y)}$   |                      |           | 2008–2020    | $0.125^\circ \times 0.125^\circ$ |
|                         | $F_{\text{Dry}}$                |                      |           | 2008–2020    | $0.125^\circ \times 0.125^\circ$ |
|                         | $F_{\text{Wet}}$                |                      |           | 2008–2020    | $0.125^\circ \times 0.125^\circ$ |
|                         | $F_{\text{NH}_x}$               |                      |           | 2008–2020    | $0.125^\circ \times 0.125^\circ$ |
|                         | $F_{\text{NH}_y}$               |                      |           | 2008–2020    | $0.125^\circ \times 0.125^\circ$ |
|                         | $F_{\text{Tot}}$                |                      |           | 2008–2020    | $0.125^\circ \times 0.125^\circ$ |

**Supplementary Table 2 | Natural and anthropogenic reactive nitrogen emissions at the global scale.** The natural emission data of reactive nitrogen were concluded from Galloway *et al.*<sup>1</sup> and Fowler *et al.*<sup>2</sup>. Community Emission Data System (CEDS)<sup>3</sup>, Emissions Database for Global Atmospheric Research (EDGAR)<sup>4</sup>, and Luo *et al.*<sup>5</sup>-BUE estimated reactive N emission using a bottom-up approach. Luo *et al.*<sup>5</sup>-TDE and Miyazaki *et al.*<sup>6</sup> estimated reactive N emission using a Top-down approach. Our study estimated NH<sub>3</sub> emission here using random forest model.

| <b>Emission (Tg N yr<sup>-1</sup>)</b> | <b>NO<sub>x</sub></b> | <b>NH<sub>3</sub></b> | <b>NH<sub>x</sub> + NO<sub>y</sub></b> |
|----------------------------------------|-----------------------|-----------------------|----------------------------------------|
| <b>Natural</b>                         |                       |                       |                                        |
| Lightening                             | 5-5.4                 |                       |                                        |
| Stratosphere                           | 0.6                   |                       |                                        |
| Natural soil                           | 18                    |                       |                                        |
| Wildfire                               | 0.8                   | 0.8                   |                                        |
| Soil and Veg                           |                       | 4.6                   |                                        |
| Ocean                                  | 5.5                   | 5.6-9                 |                                        |
| Subtotal                               | 29.9-30.3             | 11-14.4               | 40.9-44.7                              |
| <b>Anthropogenic<sup>‡</sup></b>       |                       |                       |                                        |
| CEDS [2019]                            | 36.8                  | 50.6                  |                                        |
| EDGAR [2018]                           | 37.7                  | 48.0                  |                                        |
| Luo et al. (2022)-BUE [2018]           |                       | 68.9                  |                                        |
| Luo et al. (2022)-TDE [2018]           |                       | 87.3                  |                                        |
| Miyazaki et al. (2017) [2014]          | 47.5                  |                       |                                        |
| This study [2020]                      |                       | 57.9                  |                                        |
| Subtotal                               | 36.8-47.5             | 48.0-87.3             | 84.8-134.8                             |
| <b>Total</b>                           | <b>66.7-77.8</b>      | <b>59.0-101.7</b>     | <b>125.7-179.5</b>                     |

**Supplementary Table 3 | Parameters and evaluation of EKC equations.** Note: (i)  $\beta_3 = \beta_2 = \beta_1 = 0$ . There was no relationship between  $GDP_{pc}$  and nitrogen deposition. (ii)  $\beta_1 > 0, \beta_3 = \beta_2 = 0$ . A linear relationship. (iii)  $\beta_1 < 0, \beta_3 = \beta_2 = 0$ . A monotonic decreasing relationship. (iv)  $\beta_1 > 0, \beta_2 < 0, \beta_3 = 0$ . A Normal Distribution (inverted U-shaped) relationship, that is, EKC. (v)  $\beta_1 < 0, \beta_2 > 0, \beta_3 = 0$ . A U-shaped relationship. (vi)  $\beta_1 > 0, \beta_2 < 0, \beta_3 > 0$ . A N-shaped relationship. (vii)  $\beta_1 < 0, \beta_2 > 0, \beta_3 < 0$ . Inverted N-shaped Relationship.  $F_{Dry}$  represents dry nitrogen deposition.  $F_{Wet}$  represents wet nitrogen deposition.  $F_{NHx}$  represents total NHx deposition.  $F_{NOy}$  represents total NOy deposition.  $F_{Tot}$  represents total nitrogen deposition. \$ represents U.S. dollar.

| Component | $\alpha$ | $\beta_1$ | $\beta_2$ | $\beta_3$ | $R^2$ | $P$   | Peak<br>(2011 \$) |
|-----------|----------|-----------|-----------|-----------|-------|-------|-------------------|
| $F_{Tot}$ | -22.29   | 5.82      | -0.32     | 0         | 0.72  | 0.001 | 8,899             |
| $F_{NHx}$ | -26.01   | 6.69      | -0.38     | 0         | 0.73  | 0.001 | 6,652             |
| $F_{NOy}$ | -19.87   | 4.84      | -0.26     | 0         | 0.56  | 0.001 | 11,022            |
| $F_{Wet}$ | -24.14   | 5.97      | -0.33     | 0         | 0.58  | 0.001 | 8,480             |
| $F_{Dry}$ | -23.25   | 5.81      | -0.32     | 0         | 0.54  | 0.001 | 8,762             |

**Supplementary Table 4 | N emission and deposition in North America, Western Europe and China.** The Multi-resolution Emission Inventory for China (MEIC)<sup>7</sup> was available at <http://www.meicmodel.org>. Input4MIPs data was available at <https://pcmdi.llnl.gov/search/input4mips/>. CCMI data was available at <https://blogs.reading.ac.uk/ccmi/>.

| Regions               | Emission (Tg N yr <sup>-1</sup> ) |                 |                 |       | Deposition (Tg N yr <sup>-1</sup> )          |                 |                 |       |
|-----------------------|-----------------------------------|-----------------|-----------------|-------|----------------------------------------------|-----------------|-----------------|-------|
|                       | Source                            | NO <sub>x</sub> | NH <sub>3</sub> | Sum   | Source                                       | NO <sub>x</sub> | NH <sub>3</sub> | Sum   |
| <b>North America</b>  | CEDS [2019]                       | 2.85            | 3.39            | 6.24  | Input4MIPs [2014]                            | 4.71            | 3.38            | 8.09  |
|                       | EDGAR [2018]                      | 3.89            | 4.13            | 8.02  | CCMI [2018]                                  | 3.66            | 3.39            | 7.05  |
|                       | Luo et al. (2022)-<br>TDE [2018]  |                 | 5.38            |       | Ackerman et al.,<br>2019 [2016] <sup>8</sup> | 3.15            | 3.55            | 6.7   |
|                       |                                   |                 |                 |       | This study [2020]                            | 2.72            | 4.73            | 7.45  |
| <b>Western Europe</b> | CEDS [2019]                       | 2.03            | 3.87            | 5.9   | Input4MIPs (2014)                            | 1.98            | 2.78            | 4.77  |
|                       | EDGAR [2018]                      | 2.52            | 4.95            | 7.47  | CCMI [2018]                                  | 1.65            | 2.53            | 4.18  |
|                       | Luo et al. (2022)-<br>TDE [2018]  |                 | 5.05            |       | Ackerman et al<br>(2019), [2016]             | 1.44            | 2.91            | 4.35  |
|                       |                                   |                 |                 |       | This study [2020]                            | 1.75            | 2.56            | 4.31  |
| <b>China</b>          | CEDS [2019]                       | 6.89            | 10.11           | 17    | Input4MIPs (2014)                            | 4.31            | 5.92            | 10.23 |
|                       | EDGAR [2018]                      | 7.19            | 6.82            | 13.98 | CCMI [2018]                                  | 5.02            | 6.40            | 11.42 |
|                       | Luo et al. (2022)-<br>TDE [2018]  |                 | 10.82           |       | Ackerman et al<br>(2019), [2016]             | 4.79            | 7.57            | 12.36 |
|                       | MEIC (2020)                       | 6.02            | 7.47            | 13.49 | This study [2020]                            | 5.08            | 7.20            | 12.28 |



**Supplementary Table 5 | Data sources and information of variables**

| <b>Dataset</b>                                                                                | <b>Variables</b>                                                                                                                      | <b>Time series</b> | <b>Spatial resolution</b> | <b>Reference</b>                                                                                                                                                                                 |
|-----------------------------------------------------------------------------------------------|---------------------------------------------------------------------------------------------------------------------------------------|--------------------|---------------------------|--------------------------------------------------------------------------------------------------------------------------------------------------------------------------------------------------|
| Climatic Research Unit (CRU) cru_ts4.07                                                       | Mean annual precipitation (MAP), Mean annual temperature (MAT), Wet days (WET), Vapour pressure (VAP)                                 | 1991-2022, monthly | 0.5°*0.5°                 | Harris et al. (2020) <sup>9</sup>                                                                                                                                                                |
| NCEP-NCAR Reanalysis 1                                                                        | net shortwave radiation flux (Nswrs), surface pressure (Pres), specific humidity (Shum), wind speed (Wspd)                            | 1948-2022, monthly | 1.875°*1.915°             | Kalnay et al. (1996) <sup>10</sup> . NCEP-NCAR Reanalysis 1 data provided by the NOAA PSL, Boulder, Colorado, USA, from their website at <a href="https://psl.noaa.gov">https://psl.noaa.gov</a> |
| CEDS v_2021_04_21 gridded emissions data                                                      | NH <sub>3</sub> , NO <sub>x</sub> , NMVOC, SO <sub>2</sub> emission (ENH <sub>3</sub> , ENO <sub>x</sub> , ENMVOC, ESO <sub>2</sub> ) | 1750-2019, monthly | 0.5°*0.5°                 | O'Rourke et al. (2021) <sup>3</sup>                                                                                                                                                              |
| Standard monthly IASI/Metop-A ULB-LATMOS ammonia (NH <sub>3</sub> ) L3 product (total column) | NH <sub>3</sub> column concentration (C <sub>NH3</sub> )                                                                              | 2008-2020, monthly | 1°*1°                     | Van Damme et al., (2017) <sup>11</sup>                                                                                                                                                           |
| OMI NO <sub>2</sub> : QA4ECV version 1.1                                                      | NO <sub>2</sub> column concentration (C <sub>NO2</sub> )                                                                              | 2004-2021, monthly | 0.125°*0.125°             | Boersma et al. (2011) <sup>12</sup>                                                                                                                                                              |
| OMI/Aura Sulfur Dioxide (SO <sub>2</sub> ) Total Column Daily L3                              | SO <sub>2</sub> column concentration (C <sub>SO2</sub> )                                                                              | 2004-2023, daily   | 0.25°*0.25°               | Li et al. (2020) <sup>13</sup>                                                                                                                                                                   |
| Satellite-derived PM <sub>2.5</sub>                                                           | PM <sub>2.5</sub>                                                                                                                     | 1998-2021, monthly | 0.0045°*0.0045°           | van Donkelaar et al. (2021) <sup>14</sup>                                                                                                                                                        |
| Global NPP-VIIRS-Like Nighttime Light Data                                                    | Nighttime Light (NTL)                                                                                                                 | 2000–2022, annual  | 500 m                     | Chen et al. (2021) <sup>15</sup>                                                                                                                                                                 |
| LandScan Global                                                                               | Population                                                                                                                            | 2000-2022, annual  | 1 km                      | Sims et al. (2023) <sup>16</sup>                                                                                                                                                                 |
| Global 1 km × 1 km gridded revised real gross domestic product                                | gross domestic product (GDP)                                                                                                          | 1992-2019, annual  | 1 km                      | Chen et al. (2022) <sup>17</sup>                                                                                                                                                                 |
| MOD13C2 - MODIS/Terra Vegetation Indices Monthly L3 Global 0.05Deg CMG                        | Normalized Difference Vegetation Index (NDVI)                                                                                         | 2000-2022, monthly | 0.05°*0.05°               | Didan et al. (2015) <sup>18</sup>                                                                                                                                                                |
| Global production–living–ecological space data                                                | Land use                                                                                                                              | 2000, 2010, 2020   | 1 km                      | Fu et al. (2023) <sup>19</sup>                                                                                                                                                                   |
| National Nutrient nitrogen N Use per area of cropland                                         | nitrogen-fertilizer-application-per-hectare-of-cropland (NNfer)                                                                       | 1961-2020          | Country                   | FAO (2021) <sup>20</sup>                                                                                                                                                                         |
| GDP per capita, Maddison Project database 2020                                                | gross domestic product per capita (GDPpc)                                                                                             | 1990-2021          | Country                   | Bolt and Jan (2020) <sup>21</sup>                                                                                                                                                                |
| Global crop-specific nitrogen fertilization dataset                                           | Crop-specific N application rate (Nfer)                                                                                               | 1961-2020          | 5 arc-min                 | Adalibieke et al. (2023) <sup>22</sup>                                                                                                                                                           |
| Global terrestrial Human Footprint dataset                                                    | Human Footprint (HFP)                                                                                                                 | 2000-2020          | 1 km                      | Mu et al. (2022) <sup>23</sup>                                                                                                                                                                   |

**Supplementary Table 6 | Comparison of different machine learning methods**

| Component                                         | Random forest Model |                |      |                | Support Vector Machine |                |      |                | BP neural network |                |      |                |      |
|---------------------------------------------------|---------------------|----------------|------|----------------|------------------------|----------------|------|----------------|-------------------|----------------|------|----------------|------|
|                                                   | Var explained (%)   | Training       |      | Testing        |                        | Training       |      | Testing        |                   | Training       |      | Testing        |      |
|                                                   |                     | R <sup>2</sup> | RMSE | R <sup>2</sup> | RMSE                   | R <sup>2</sup> | RMSE | R <sup>2</sup> | RMSE              | R <sup>2</sup> | RMSE | R <sup>2</sup> | RMSE |
| Wet NO <sub>y</sub> deposition                    | 76.57               | 0.97           | 0.56 | 0.83           | 1.47                   | 0.62           | 1.92 | 0.54           | 1.93              | 0.59           | 0.06 | 0.53           | 0.06 |
| Wet NH <sub>x</sub> deposition                    | 77.34               | 0.97           | 0.66 | 0.75           | 1.92                   | 0.60           | 2.20 | 0.55           | 2.61              | 0.60           | 0.06 | 0.55           | 0.06 |
| Ground NH <sub>3</sub> concentration              | 79.13               | 0.97           | 0.52 | 0.84           | 1.52                   | 0.62           | 1.94 | 0.63           | 1.72              | 0.60           | 0.09 | 0.59           | 0.08 |
| Ground NH <sub>4</sub> <sup>+</sup> concentration | 83.25               | 0.98           | 0.36 | 0.93           | 0.48                   | 0.74           | 1.19 | 0.68           | 1.15              | 0.75           | 0.03 | 0.67           | 0.03 |
| Ground NO <sub>3</sub> <sup>-</sup> concentration | 73.78               | 0.88           | 0.38 | 0.82           | 0.48                   | 0.78           | 0.53 | 0.67           | 0.51              | 0.84           | 0.04 | 0.67           | 0.05 |
| Ground NO <sub>2</sub> concentration              | 84.58               | 0.98           | 0.55 | 0.84           | 1.21                   | 0.63           | 2.30 | 0.74           | 1.60              | 0.50           | 0.07 | 0.65           | 0.05 |
| Ground HNO <sub>3</sub> concentration             | 81.90               | 0.97           | 0.06 | 0.89           | 0.13                   | 0.77           | 0.18 | 0.71           | 0.20              | 0.78           | 0.07 | 0.67           | 0.08 |

**Supplementary Table 7 | Parameter and performance of random forest models in this study.** pNH<sub>3</sub> represents the predicted NH<sub>3</sub> emissions. CNH<sub>3</sub>, CNO<sub>2</sub>, and CSO<sub>2</sub> indicate satellite NH<sub>3</sub>, NO<sub>2</sub>, and SO<sub>2</sub> concentrations, respectively. ENH<sub>3</sub>, ENOX, ESO<sub>2</sub>, and ENMVOC denote emissions of NH<sub>3</sub>, NO<sub>x</sub>, SO<sub>2</sub>, and non-methane volatile organic compounds (NMVOC), respectively. MAP stands for mean annual precipitation, MAT for mean annual temperature, WET indicates the number of wet days, VAP is vapor pressure, Nswrs is net shortwave radiation flux, Pres is surface pressure, Shum is specific humidity, Wspd is wind speed, NDVI is the Normalized Difference Vegetation Index, Landuse refers to land use data from the Global Production - Living - Ecological Space data, Nfer represents nitrogen fertilizer use, GDP is gross domestic product, GDPpc is gross domestic product per capita, POP is the population, and NTL is night light.

| Model          | Variables                                                                                                                                                                                            | Component                                         | Sample | Hyperparameter |       |           | Var explained % | Training       |       | Testing        |       |
|----------------|------------------------------------------------------------------------------------------------------------------------------------------------------------------------------------------------------|---------------------------------------------------|--------|----------------|-------|-----------|-----------------|----------------|-------|----------------|-------|
|                |                                                                                                                                                                                                      |                                                   |        | mtry           | ntree | Nodes ize |                 | R <sup>2</sup> | RMSE  | R <sup>2</sup> | RMSE  |
| n6 model       | MAP, GDPpc, CNO <sub>2</sub> , CNH <sub>3</sub> , ENOX, ENH <sub>3</sub>                                                                                                                             | Wet NH <sub>x</sub> deposition                    | 3300   | 2              | 800   | 1         | 72.15           | 0.97           | 0.74  | 0.70           | 1.89  |
|                |                                                                                                                                                                                                      | Wet NO <sub>y</sub> deposition                    | 3300   | 2              | 800   | 3         | 73.70           | 0.96           | 0.64  | 0.67           | 1.96  |
|                |                                                                                                                                                                                                      | Ground HNO <sub>3</sub> concentration             | 2141   | 2              | 800   | 1         | 82.72           | 0.98           | 0.06  | 0.83           | 0.15  |
|                |                                                                                                                                                                                                      | Ground NO <sub>3</sub> <sup>-</sup> concentration | 2344   | 1              | 400   | 7         | 75.93           | 0.92           | 0.32  | 0.80           | 0.38  |
|                |                                                                                                                                                                                                      | Ground NO <sub>2</sub> concentration              | 2360   | 2              | 500   | 1         | 81.94           | 0.98           | 0.59  | 0.79           | 1.55  |
|                |                                                                                                                                                                                                      | Ground NH <sub>4</sub> <sup>+</sup> concentration | 2906   | 1              | 700   | 1         | 80.26           | 0.97           | 0.40  | 0.83           | 0.74  |
|                |                                                                                                                                                                                                      | Ground NH <sub>3</sub> concentration              | 2081   | 2              | 500   | 2         | 76.33           | 0.97           | 0.57  | 0.82           | 1.47  |
| n22 best model | ENH <sub>3</sub> , ENOX, ENMVOC, ESO <sub>2</sub> , CNH <sub>3</sub> , CNO <sub>2</sub> , CSO <sub>2</sub> , MAP, MAT, WET, VAP, Nswrs, Pres, Shum, Wspd, NTL, GDP, POP, GDPpc, Nfer, NDVI, land use | Wet NH <sub>x</sub> deposition                    | 3300   | 2              | 700   | 1         | 77.34           | 0.97           | 0.66  | 0.75           | 1.92  |
|                |                                                                                                                                                                                                      | Wet NO <sub>y</sub> deposition                    | 3300   | 3              | 800   | 1         | 76.57           | 0.97           | 0.56  | 0.83           | 1.47  |
|                |                                                                                                                                                                                                      | Ground HNO <sub>3</sub> concentration             | 2124   | 4              | 700   | 3         | 81.90           | 0.97           | 0.06  | 0.89           | 0.13  |
|                |                                                                                                                                                                                                      | Ground NO <sub>3</sub> <sup>-</sup> concentration | 2218   | 1              | 600   | 15        | 73.78           | 0.88           | 0.38  | 0.82           | 0.48  |
|                |                                                                                                                                                                                                      | Ground NO <sub>2</sub> concentration              | 2228   | 2              | 800   | 1         | 84.58           | 0.98           | 0.55  | 0.84           | 1.21  |
|                |                                                                                                                                                                                                      | Ground NH <sub>4</sub> <sup>+</sup> concentration | 2741   | 2              | 500   | 1         | 83.25           | 0.98           | 0.36  | 0.93           | 0.48  |
|                |                                                                                                                                                                                                      | Ground NH <sub>3</sub> concentration              | 2034   | 3              | 900   | 1         | 79.13           | 0.97           | 0.52  | 0.84           | 1.50  |
| Cascade model  | CNH <sub>3</sub> , CNO <sub>2</sub> , CSO <sub>2</sub> , NTL, GDP, POP, GDPpc, Nfer, NDVI, landuse                                                                                                   | Predict NH <sub>3</sub> emission                  | 124110 | 5              | 1000  | 1         | 98.04           | 0.99           | 75.77 | 0.98           | 171.4 |
|                | pNH <sub>3</sub> , CNH <sub>3</sub> , CNO <sub>2</sub> , CSO <sub>2</sub> , ENOX, ENMVOC, ESO <sub>2</sub> , MAP, MAT, WET, VAP, Nswrs, Pres, Shum, Wspd                                             | Wet NH <sub>x</sub> deposition                    | 3558   | 2              | 900   | 1         | 75.14           | 0.97           | 0.66  | 0.75           | 1.79  |
|                |                                                                                                                                                                                                      | Wet NO <sub>y</sub> deposition                    | 3558   | 2              | 700   | 1         | 75.45           | 0.97           | 0.57  | 0.74           | 1.48  |
|                |                                                                                                                                                                                                      | Ground HNO <sub>3</sub> concentration             | 2306   | 4              | 600   | 3         | 82.55           | 0.97           | 0.06  | 0.88           | 0.11  |
|                |                                                                                                                                                                                                      | Ground NO <sub>3</sub> <sup>-</sup> concentration | 2430   | 2              | 900   | 13        | 76.80           | 0.91           | 0.31  | 0.79           | 0.49  |
|                |                                                                                                                                                                                                      | Ground NO <sub>2</sub> concentration              | 2440   | 3              | 700   | 1         | 82.86           | 0.98           | 0.57  | 0.88           | 1.16  |
|                |                                                                                                                                                                                                      | Ground NH <sub>4</sub> <sup>+</sup> concentration | 2938   | 1              | 1000  | 1         | 83.71           | 0.98           | 0.34  | 0.82           | 0.79  |
|                |                                                                                                                                                                                                      | Ground NH <sub>3</sub> concentration              | 2209   | 2              | 700   | 1         | 75.40           | 0.97           | 0.55  | 0.83           | 1.24  |

**Supplementary Table 8 | Regional N deposition flux and total input in 2020 from 3 models**

| Regions         | Cascade model                                 |      |       |                                     | n24 best model                                |      |       |                                     | n6 model                                      |      |       |                                     |
|-----------------|-----------------------------------------------|------|-------|-------------------------------------|-----------------------------------------------|------|-------|-------------------------------------|-----------------------------------------------|------|-------|-------------------------------------|
|                 | $F_N$ (kg ha <sup>-1</sup> yr <sup>-1</sup> ) |      |       | N input<br>(Tg N yr <sup>-1</sup> ) | $F_N$ (kg ha <sup>-1</sup> yr <sup>-1</sup> ) |      |       | N input<br>(Tg N yr <sup>-1</sup> ) | $F_N$ (kg ha <sup>-1</sup> yr <sup>-1</sup> ) |      |       | N input<br>(Tg N yr <sup>-1</sup> ) |
|                 | NHx                                           | NOy  | Total |                                     | NHx                                           | NOy  | Total |                                     | NHx                                           | NOy  | Total |                                     |
| Africa          | 4.98                                          | 2.45 | 7.43  | 22.14                               | 4.41                                          | 2.96 | 7.36  | 21.94                               | 3.95                                          | 2.43 | 6.37  | 18.99                               |
| Central America | 6.22                                          | 3.63 | 9.85  | 2.59                                | 5.89                                          | 4.18 | 10.07 | 2.65                                | 4.85                                          | 3.37 | 8.22  | 2.16                                |
| Central Asia    | 3.09                                          | 2.03 | 5.12  | 2.05                                | 2.81                                          | 1.96 | 4.77  | 1.91                                | 1.87                                          | 1.56 | 3.43  | 1.37                                |
| East Asia       | 6.76                                          | 4.91 | 11.66 | 13.43                               | 6.82                                          | 4.85 | 11.67 | 13.44                               | 6.67                                          | 4.71 | 11.38 | 13.11                               |
| East Europe     | 1.28                                          | 1.03 | 2.30  | 4.01                                | 1.38                                          | 1.05 | 2.44  | 4.24                                | 1.34                                          | 0.85 | 2.19  | 3.81                                |
| Greeland        | 0.14                                          | 0.08 | 0.22  | 0.05                                | 0.21                                          | 0.11 | 0.32  | 0.07                                | 0.26                                          | 0.11 | 0.37  | 0.08                                |
| North America   | 2.50                                          | 1.40 | 3.90  | 7.37                                | 2.52                                          | 1.50 | 4.02  | 7.61                                | 2.47                                          | 1.43 | 3.90  | 7.38                                |
| Oceania         | 3.59                                          | 1.50 | 5.09  | 4.25                                | 2.48                                          | 1.73 | 4.20  | 3.50                                | 1.93                                          | 1.04 | 2.97  | 2.48                                |
| South America   | 6.78                                          | 3.83 | 10.61 | 18.68                               | 5.38                                          | 3.70 | 9.07  | 15.97                               | 5.30                                          | 2.78 | 8.08  | 14.22                               |
| South Asia      | 13.64                                         | 9.22 | 22.86 | 9.82                                | 13.76                                         | 7.68 | 21.44 | 9.21                                | 13.32                                         | 8.05 | 21.37 | 9.18                                |
| Southeast Asia  | 7.59                                          | 4.87 | 12.46 | 5.33                                | 7.03                                          | 5.15 | 12.18 | 5.21                                | 6.99                                          | 4.74 | 11.73 | 5.02                                |
| West Asia       | 3.24                                          | 3.03 | 6.27  | 4.22                                | 3.18                                          | 3.30 | 6.48  | 4.36                                | 2.37                                          | 2.56 | 4.93  | 3.32                                |
| West Europe     | 4.66                                          | 3.31 | 7.97  | 4.08                                | 5.01                                          | 3.47 | 8.48  | 4.34                                | 5.29                                          | 3.49 | 8.78  | 4.50                                |
| Global          | 4.61                                          | 2.79 | 7.40  | 98.01                               | 4.23                                          | 2.90 | 7.13  | 94.44                               | 3.96                                          | 2.50 | 6.47  | 85.60                               |

## Supplementary Reference

1. Galloway JN, *et al.* Nitrogen cycles: Past, present, and future. *Biogeochemistry* **70**, 153-226 (2004).
2. Fowler D, *et al.* The global nitrogen cycle in the twenty-first century. *Philos. Trans. R. Soc. B* **368**, 20130164 (2013).
3. O'Rourke PR, *et al.* CEDS v-2021\_04\_21 Gridded Emissions Data (accessed on 1 Dec 2021, available at <https://data.pnnl.gov/dataset/CEDS-4-21-21>). (2021).
4. Johansson L, Jalkanen J-P, Kukkonen J. Global assessment of shipping emissions in 2015 on a high spatial and temporal resolution. *Atmos. Environ.* **167**, 403-415 (2017).
5. Luo Z, *et al.* Estimating global ammonia (NH<sub>3</sub>) emissions based on IASI observations from 2008 to 2018. *Atmos. Chem. Phys.* **22**, 10375-10388 (2022).
6. Miyazaki K, *et al.* Decadal changes in global surface NO<sub>x</sub> emissions from multi-constituent satellite data assimilation. *Atmos. Chem. Phys.* **17**, 807-837 (2017).
7. Zheng B, *et al.* Trends in China's anthropogenic emissions since 2010 as the consequence of clean air actions. *Atmos. Chem. Phys.* **18**, 14095-14111 (2018).
8. Ackerman D, Millet DB, Chen X. Global estimates of inorganic nitrogen deposition across four decades. *Global Biogeochem. Cycles* **33**, 100-107 (2019).
9. Harris I, Osborn TJ, Jones P, Lister D. Version 4 of the CRU TS monthly high-resolution gridded multivariate climate dataset. *Sci. Data* **7**, 109 (2020).
10. Kalnay E, *et al.* The NCEP/NCAR 40-Year reanalysis project *Journal Bulletin of the American Meteorological Society* **77**, 437-472 (1996).
11. Van Damme M, *et al.* Version 2 of the IASI NH<sub>3</sub> neural network retrieval algorithm: near-real-time and reanalysed datasets. *Atmos. Meas. Tech.* **10**, 4905-4914 (2017).
12. Boersma KF, *et al.* An improved tropospheric NO<sub>2</sub> column retrieval algorithm for the Ozone Monitoring Instrument. *Atmos. Meas. Tech.* **4**, 1905-1928 (2011).
13. Li C, *et al.* Version 2 Ozone Monitoring Instrument SO<sub>2</sub> product (OMSO<sub>2</sub> V2): new anthropogenic SO<sub>2</sub> vertical column density dataset. *Atmos. Meas. Tech.* **13**, 6175-6191 (2020).
14. van Donkelaar A, *et al.* Monthly global estimates of fine particulate matter and their uncertainty. *Environ. Sci. Technol.* **55**, 15287-15300 (2021).
15. Chen Z, *et al.* An extended time series (2000–2018) of global NPP-VIIRS-like nighttime light data from a cross-sensor calibration. *Earth Syst. Sci. Data* **13**, 889-906 (2021).
16. K. Sims, *et al.* LandScan Global 2022 (access on 3 Aug 2022, available at <https://doi.org/10.48690/1529167>). (2022).
17. Chen J, *et al.* Global 1 km × 1 km gridded revised real gross domestic product and electricity consumption during 1992–2019 based on calibrated nighttime light data. *Sci. Data* **9**, 202 (2022).
18. K. Didan, A. Huete, DAAC NL. MOD13C2 MODIS/Terra Vegetation Indices Monthly L3 Global 0.05Deg CMG (access on 5 Jun 2022, available at <http://doi.org/10.5067/MODIS/MOD13C2.006>). (2015).
19. Fu J, Gao Q, Jiang D, Li X, Lin G. Spatial–temporal distribution of global production–living–ecological space during the period 2000–2020. *Sci. Data* **10**, 589 (2023).
20. FAO. FAOSTAT Fertilizers by Nutrient Database (accessed on 1 Jan 2022, available at <https://www.fao.org/faostat/en/#data>). (2021).
21. Bolt J, Jan LvZ. Maddison Project Database (accessed on 1 Feb 2022, available at <https://www.rug.nl/ggdc/historicaldevelopment/maddison/releases/maddison-project-database-2020>). (2020).
22. Adalibieke W, Cui X, Cai H, You L, Zhou F. Global crop-specific nitrogen fertilization dataset in 1961–2020.

*Sci. Data* **10**, 617 (2023).

23. Mu H, *et al.* A global record of annual terrestrial Human Footprint dataset from 2000 to 2018. *Sci. Data* **9**, 176 (2022).
