# Supplementary material for: Changing patterns of global nitrogen deposition driven by socio-economic development
Source: PubMed Central journal article supplement — Nat Commun. 2025 Jan 2;16:46. doi: 10.1038/s41467-024-55606-y (PMC11695605; doi:10.1038/s41467-024-55606-y), 2025-01-02
Supplement: 41467_2024_55606_MOESM2_ESM.pdf [file 41467_2024_55606_MOESM2_ESM.pdf]

## Description of Additional Supplementary Files

**Supplementary Data 1 | N deposition data obtained from literatures and the list of literatures.** Wet deposition components include wet  $\text{NH}_4^+$  and  $\text{NO}_3^-$  deposition. Dry deposition components include dry  $\text{NH}_3$ ,  $\text{NH}_4^+$ ,  $\text{NO}_2$ ,  $\text{NO}_3^-$ , and  $\text{HNO}_3$  deposition.
