# Supplementary material for: Changing patterns of global nitrogen deposition driven by socio-economic development
Source: PubMed Central journal article supplement — Nat Commun. 2025 Jan 2;16:46. doi: 10.1038/s41467-024-55606-y (PMC11695605; doi:10.1038/s41467-024-55606-y), 2025-01-02
Supplement: 41467_2024_55606_MOESM4_ESM.pdf [file 41467_2024_55606_MOESM4_ESM.pdf]

## Reporting Summary

Nature Portfolio wishes to improve the reproducibility of the work that we publish. This form provides structure for consistency and transparency in reporting. For further information on Nature Portfolio policies, see our [Editorial Policies](#) and the [Editorial Policy Checklist](#).

### Statistics

For all statistical analyses, confirm that the following items are present in the figure legend, table legend, main text, or Methods section.

- | n/a                                 | Confirmed                                                                                                                                                                                                                                                                                      |
|-------------------------------------|------------------------------------------------------------------------------------------------------------------------------------------------------------------------------------------------------------------------------------------------------------------------------------------------|
| <input type="checkbox"/>            | <input checked="" type="checkbox"/> The exact sample size ( $n$ ) for each experimental group/condition, given as a discrete number and unit of measurement                                                                                                                                    |
| <input checked="" type="checkbox"/> | <input type="checkbox"/> A statement on whether measurements were taken from distinct samples or whether the same sample was measured repeatedly                                                                                                                                               |
| <input checked="" type="checkbox"/> | <input type="checkbox"/> The statistical test(s) used AND whether they are one- or two-sided<br><i>Only common tests should be described solely by name; describe more complex techniques in the Methods section.</i>                                                                          |
| <input checked="" type="checkbox"/> | <input type="checkbox"/> A description of all covariates tested                                                                                                                                                                                                                                |
| <input checked="" type="checkbox"/> | <input type="checkbox"/> A description of any assumptions or corrections, such as tests of normality and adjustment for multiple comparisons                                                                                                                                                   |
| <input type="checkbox"/>            | <input checked="" type="checkbox"/> A full description of the statistical parameters including central tendency (e.g. means) or other basic estimates (e.g. regression coefficient) AND variation (e.g. standard deviation) or associated estimates of uncertainty (e.g. confidence intervals) |
| <input checked="" type="checkbox"/> | <input type="checkbox"/> For null hypothesis testing, the test statistic (e.g. $F$ , $t$ , $r$ ) with confidence intervals, effect sizes, degrees of freedom and $P$ value noted<br><i>Give <math>P</math> values as exact values whenever suitable.</i>                                       |
| <input checked="" type="checkbox"/> | <input type="checkbox"/> For Bayesian analysis, information on the choice of priors and Markov chain Monte Carlo settings                                                                                                                                                                      |
| <input checked="" type="checkbox"/> | <input type="checkbox"/> For hierarchical and complex designs, identification of the appropriate level for tests and full reporting of outcomes                                                                                                                                                |
| <input checked="" type="checkbox"/> | <input type="checkbox"/> Estimates of effect sizes (e.g. Cohen's $d$ , Pearson's $r$ ), indicating how they were calculated                                                                                                                                                                    |

*Our web collection on [statistics for biologists](#) contains articles on many of the points above.*

### Software and code

Policy information about [availability of computer code](#)

|                 |                                                        |
|-----------------|--------------------------------------------------------|
| Data collection | pre-collected data was used                            |
| Data analysis   | R studio 2024.04.2<br>SPSS version 13.0<br>ArcGIS 10.0 |

For manuscripts utilizing custom algorithms or software that are central to the research but not yet described in published literature, software must be made available to editors and reviewers. We strongly encourage code deposition in a community repository (e.g. GitHub). See the Nature Portfolio [guidelines for submitting code & software](#) for further information.

### Data

Policy information about [availability of data](#)

All manuscripts must include a [data availability statement](#). This statement should provide the following information, where applicable:

- Accession codes, unique identifiers, or web links for publicly available datasets
- A description of any restrictions on data availability
- For clinical datasets or third party data, please ensure that the statement adheres to our [policy](#)

The global N deposition grid dataset (2008-2020) and source data are available at <https://www.eanet.asia/>. Monitoring data from EANET are obtained from <https://www.eanet.asia/>. Monitoring data from EMEP are obtained from <https://emep.int/>. Monitoring data from CASTNET are obtained from <https://www.eanet.asia/>.

www.epa.gov/castnet/download-data. Monitoring data from AQS are obtained from <https://www.epa.gov/outdoor-air-quality-data>. Monitoring data from AMoN are obtained from [nadp.slh.wisc.edu/networks/ammonia-monitoring-network/](https://nadp.slh.wisc.edu/networks/ammonia-monitoring-network/). Monitoring data from CAPMoN are obtained from <https://www.canada.ca/en/environment-climate-change/services/air-pollution/monitoring-networks-data.html>. Monitoring data from APQMP are obtained from <https://open.canada.ca/data/dataset/ed1d9a68-fce1-4dbc-8158-67d38019aef8>.

## Research involving human participants, their data, or biological material

Policy information about studies with [human participants or human data](#). See also policy information about [sex, gender \(identity/presentation\), and sexual orientation](#) and [race, ethnicity and racism](#).

|                                                                    |                                                                                       |
|--------------------------------------------------------------------|---------------------------------------------------------------------------------------|
| Reporting on sex and gender                                        | <input type="text" value="This information has not been collected. Not applicable."/> |
| Reporting on race, ethnicity, or other socially relevant groupings | <input type="text" value="Not applicable."/>                                          |
| Population characteristics                                         | <input type="text" value="Not applicable."/>                                          |
| Recruitment                                                        | <input type="text" value="Not applicable."/>                                          |
| Ethics oversight                                                   | <input type="text" value="Not applicable."/>                                          |

Note that full information on the approval of the study protocol must also be provided in the manuscript.

## Field-specific reporting

Please select the one below that is the best fit for your research. If you are not sure, read the appropriate sections before making your selection.

Life sciences     Behavioural & social sciences     Ecological, evolutionary & environmental sciences

For a reference copy of the document with all sections, see [nature.com/documents/nr-reporting-summary-flat.pdf](https://nature.com/documents/nr-reporting-summary-flat.pdf)

## Ecological, evolutionary & environmental sciences study design

All studies must disclose on these points even when the disclosure is negative.

|                          |                                              |
|--------------------------|----------------------------------------------|
| Study description        | <input type="text" value="Not applicable."/> |
| Research sample          | <input type="text" value="Not applicable."/> |
| Sampling strategy        | <input type="text" value="Not applicable."/> |
| Data collection          | <input type="text" value="Not applicable."/> |
| Timing and spatial scale | <input type="text" value="Not applicable."/> |
| Data exclusions          | <input type="text" value="Not applicable."/> |
| Reproducibility          | <input type="text" value="Not applicable."/> |
| Randomization            | <input type="text" value="Not applicable."/> |
| Blinding                 | <input type="text" value="Not applicable."/> |

Did the study involve field work?  Yes     No

## Reporting for specific materials, systems and methods

We require information from authors about some types of materials, experimental systems and methods used in many studies. Here, indicate whether each material, system or method listed is relevant to your study. If you are not sure if a list item applies to your research, read the appropriate section before selecting a response.

## Materials &amp; experimental systems

- n/a | Involved in the study
- Antibodies
- Eukaryotic cell lines
- Palaeontology and archaeology
- Animals and other organisms
- Clinical data
- Dual use research of concern
- Plants

## Methods

- n/a | Involved in the study
- ChIP-seq
- Flow cytometry
- MRI-based neuroimaging

## Plants

Seed stocks

Not applicable.

Novel plant genotypes

Not applicable.

Authentication

Not applicable.
